# Supplementary material for: Towards defining the chloroviruses: a genomic journey through a genus of large DNA viruses
Source: PubMed Central journal article supplement (PMC3602175; doi:10.1186/1471-2164-14-158), 2013-03-08
Supplement: 1471-2164-14-158-S2.pdf [file 1471-2164-14-158-S2.pdf]

Table S2: Examples of orthologous protein clusters viewed for the first time in Chloroviruses.

| Cluster ID | Putative function                  |
|------------|------------------------------------|
| CL0049     | Fumarate reductase                 |
| CL0462     | Acetyltransferase<br>SAM-dependent |
| CL0875     | Methyltransferase                  |
| CL0940     | Nitroreductase                     |
| CL0963     | Glycosyl hydrolase                 |
| CL1018     | Helicase                           |
