# Supplementary material for: Towards defining the chloroviruses: a genomic journey through a genus of large DNA viruses
Source: PubMed Central journal article supplement (PMC3602175; doi:10.1186/1471-2164-14-158), 2013-03-08

Figure S2

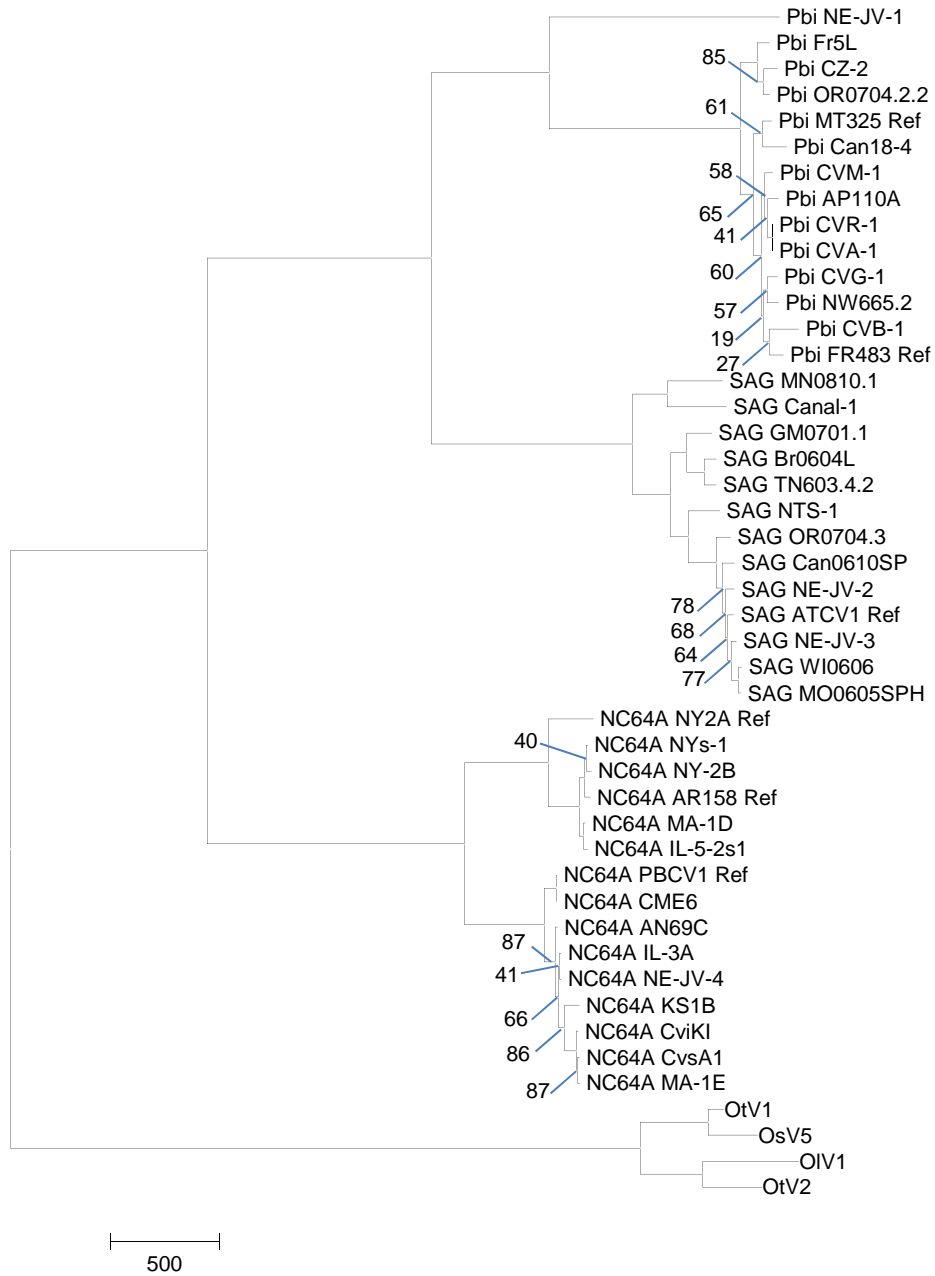

Supplement: 1471-2164-14-158-S4.pdf [file 1471-2164-14-158-S4.pdf]
