# Supplementary material for: Towards defining the chloroviruses: a genomic journey through a genus of large DNA viruses
Source: PubMed Central journal article supplement (PMC3602175; doi:10.1186/1471-2164-14-158), 2013-03-08
Supplement: 1471-2164-14-158-S5.pdf [file 1471-2164-14-158-S5.pdf]

Table S3 : PBCV-1 genes missing in the KS1B genome as the result of a 35Kb deletion

| PBCV-1 gene name | Predicted function                    |
|------------------|---------------------------------------|
| A002L            | Unknown protein                       |
| A002bL           | Hypothetical protein                  |
| A002cR           | Hypothetical protein                  |
| A003R            | Unknown protein                       |
| A005R            | Unknown protein                       |
| A007/008L        | Unknown protein                       |
| A009R            | Unknown protein                       |
| A010R            | Capsid protein                        |
| A011L            | Capsid protein                        |
| A014R            | Unknown protein                       |
| A018L            | Unknown protein                       |
| A025/027/029L    | Unknown protein                       |
| A034R            | Protein kinase                        |
| A035L            | Unknown protein                       |
| A037L            | Unknown protein                       |
| A039L            | Unknown protein                       |
| A041R            | Unknown protein                       |
| A044L            | Unknown protein                       |
| A048R            | Unknown protein                       |
| A049L            | Unknown protein                       |
| A050L            | Pyrimidine dimer-specific glycosylase |
| A050aL           | Hypothetical protein                  |
| A051L            | Unknown protein                       |
| A053R            | Unknown protein                       |
| A058L            | Hypothetical protein                  |
| A057aR           | Hypothetical protein                  |
| A060L            | Unknown protein                       |
| A061L            | Unknown protein                       |
| A063L            | Unknown protein                       |
