# Supplementary material for: Towards defining the chloroviruses: a genomic journey through a genus of large DNA viruses
Source: PubMed Central journal article supplement (PMC3602175; doi:10.1186/1471-2164-14-158), 2013-03-08
Supplement: 1471-2164-14-158-S6.pdf [file 1471-2164-14-158-S6.pdf]

Figure S3

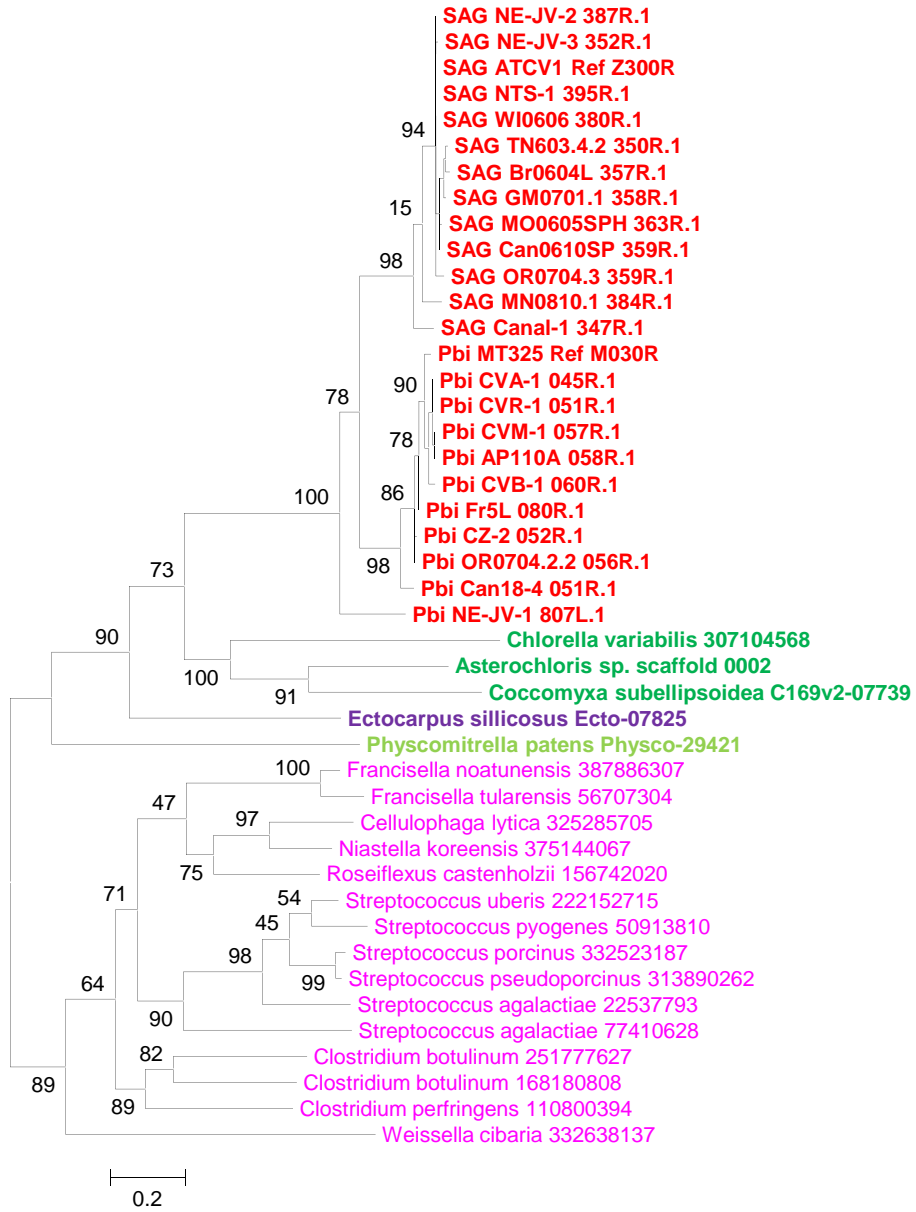

CL0466: MIP family channel protein

# CL0780: dUDP-D-glucose 4,6-dehydratase

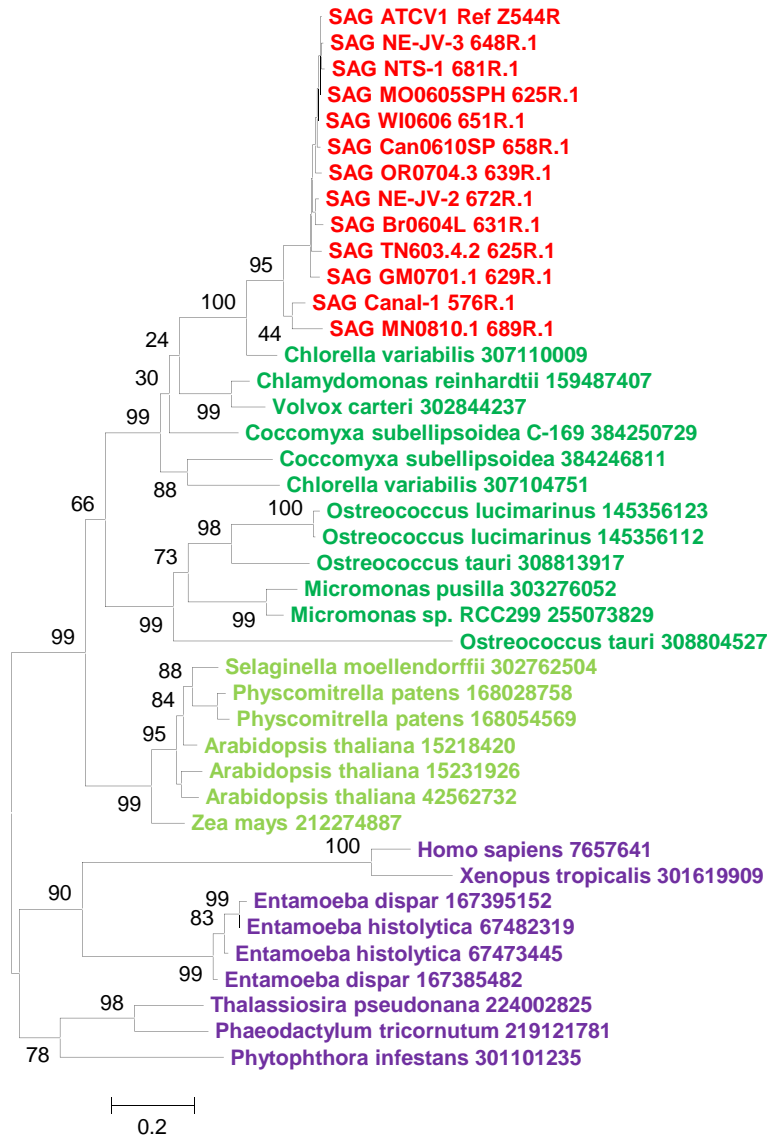

Figure S3: continued

# CL0049: NADH-dependent fumarate reductase

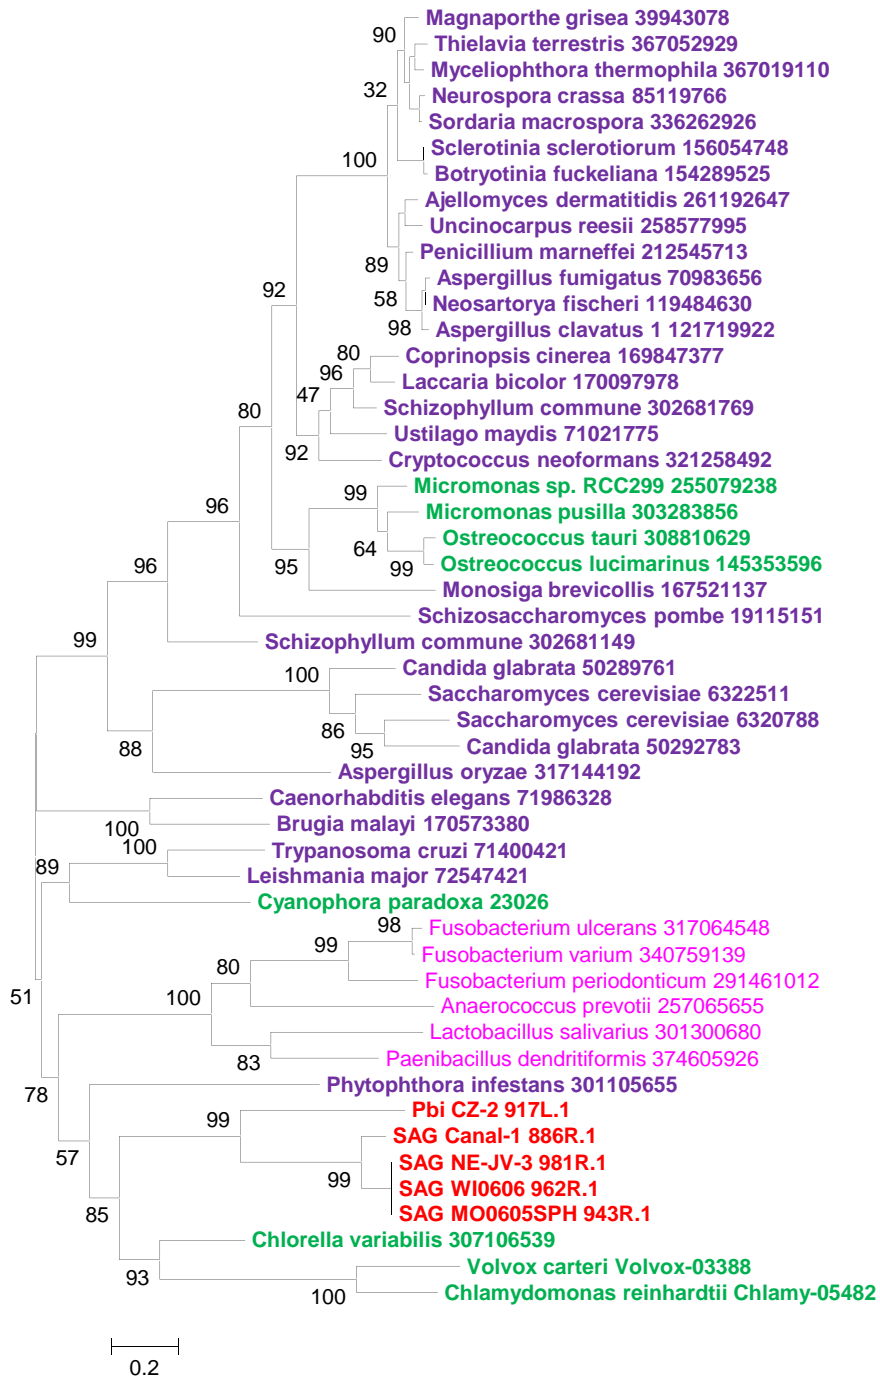

Figure S3: continued

# CL0624: THYLAKOID FORMATION 1

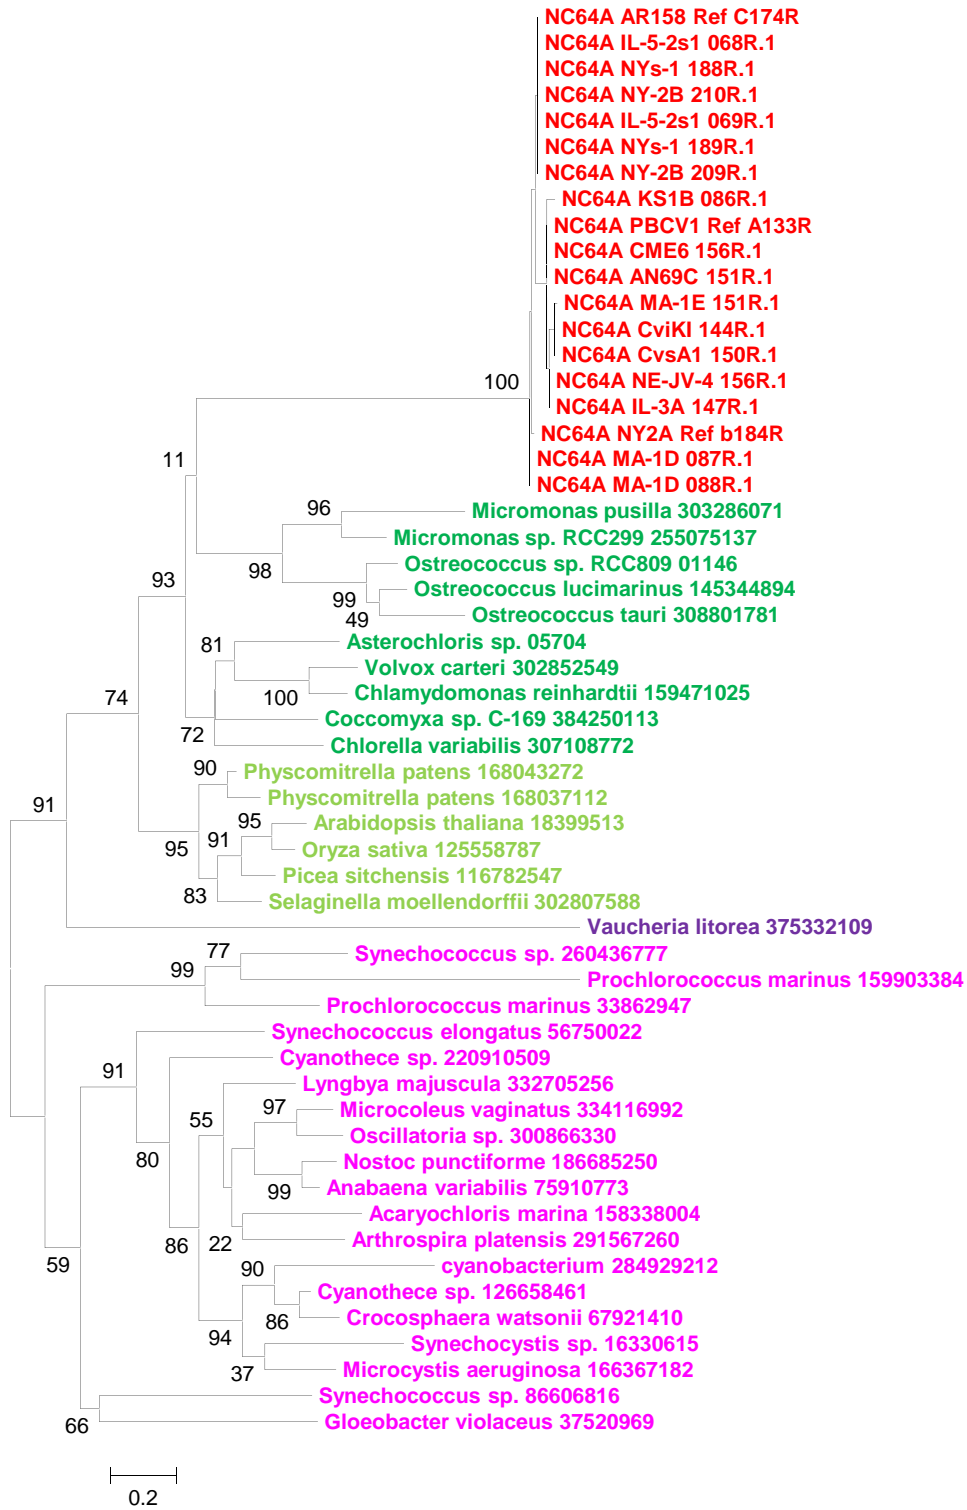

Figure S3: continued

CL0778: unknown function

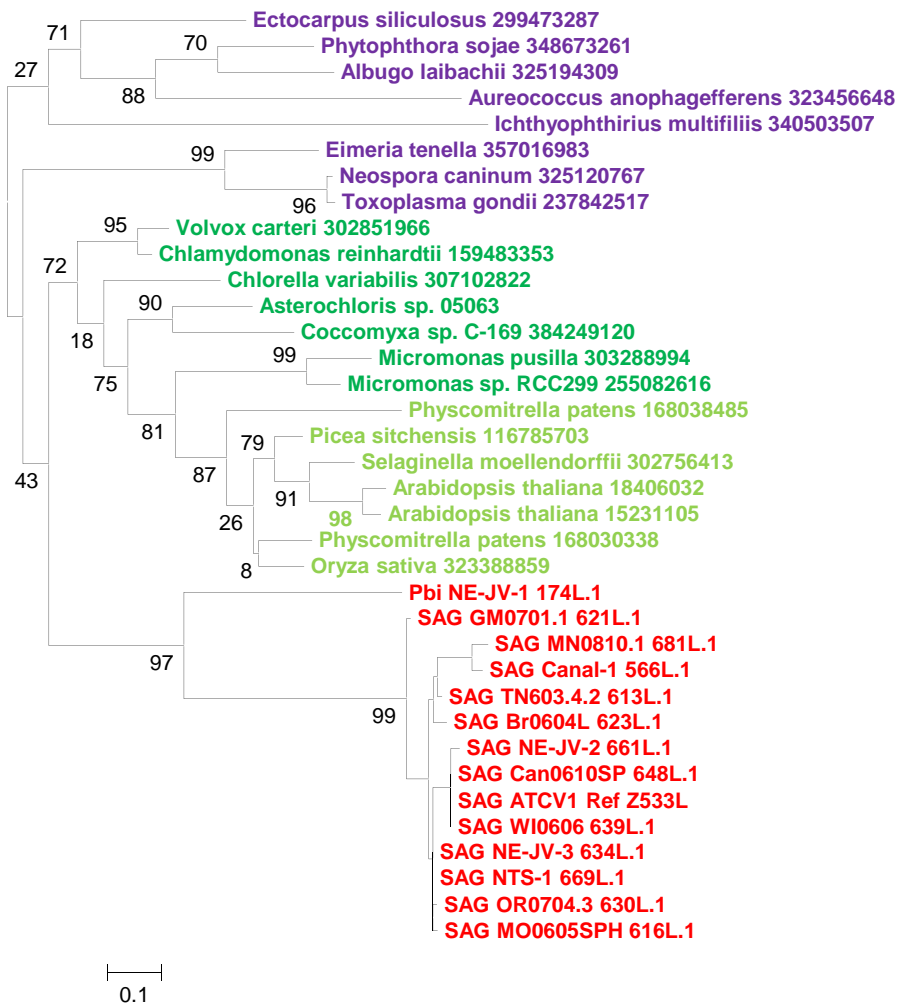

Figure S3: continued

# CL0796: ribonucleoside-triphosphate reductase

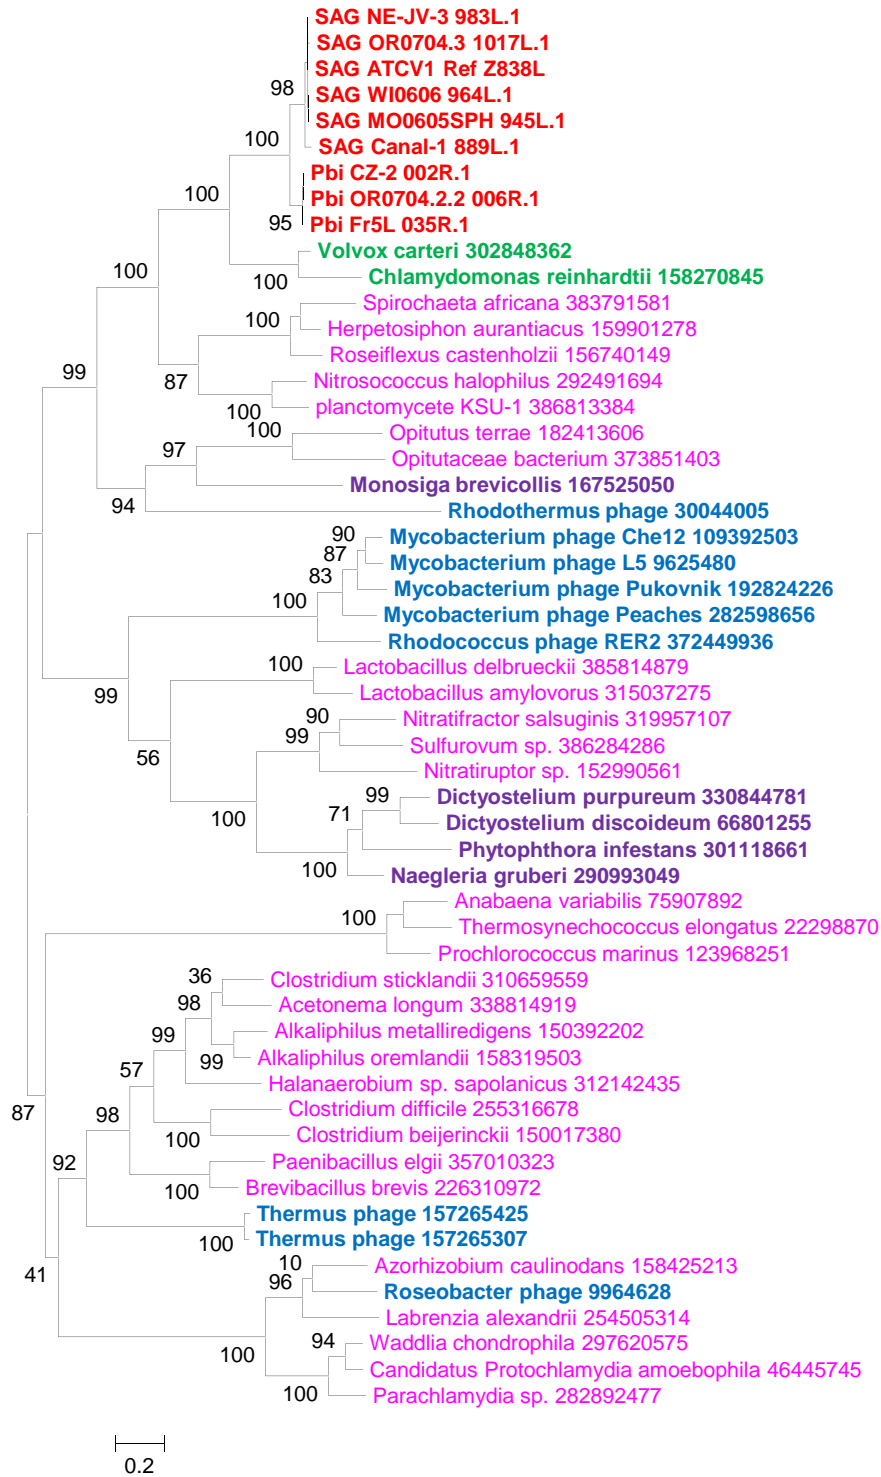

Figure S3: continued

### CL0063: unknown function

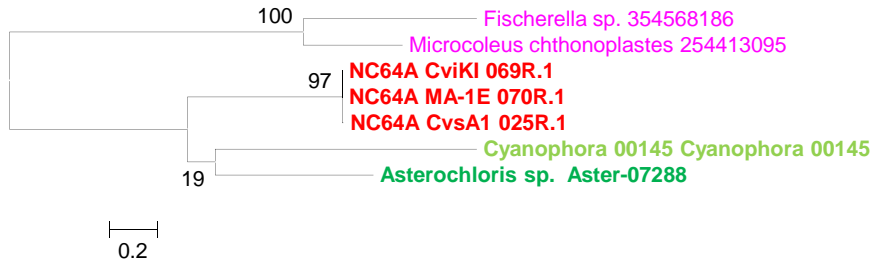

### CL0978: unknown function

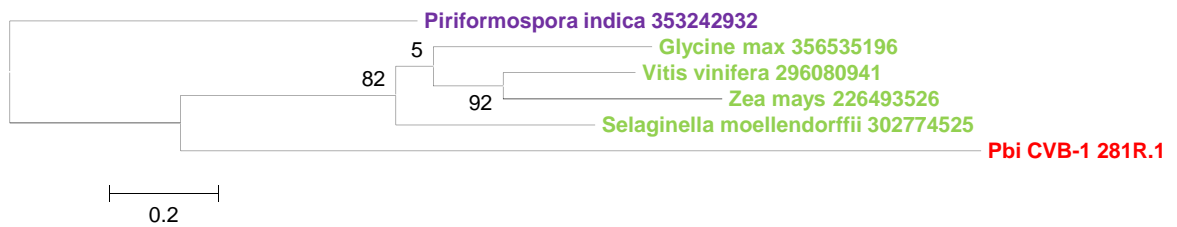

### CL0375: glycosyltransferase

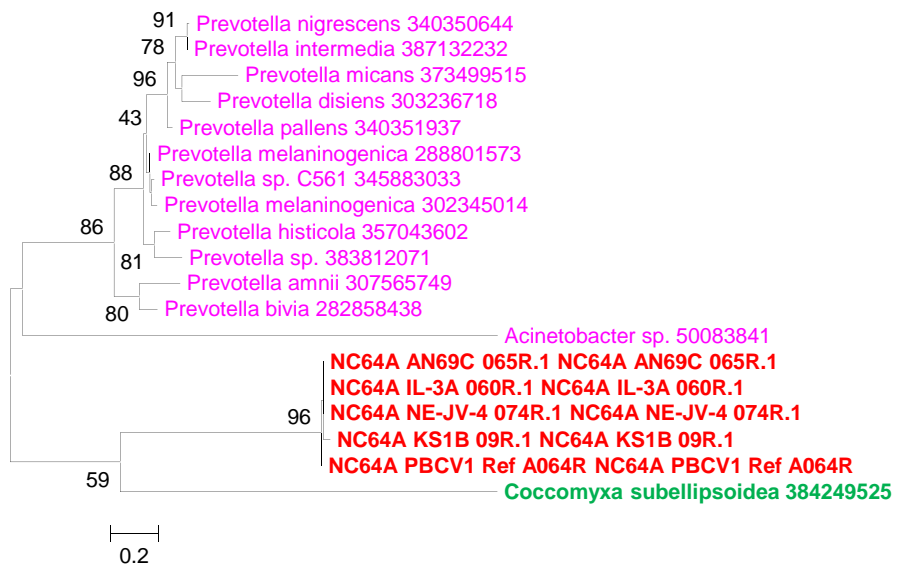

Figure S3: continued

## CL0940: Nitroreductase

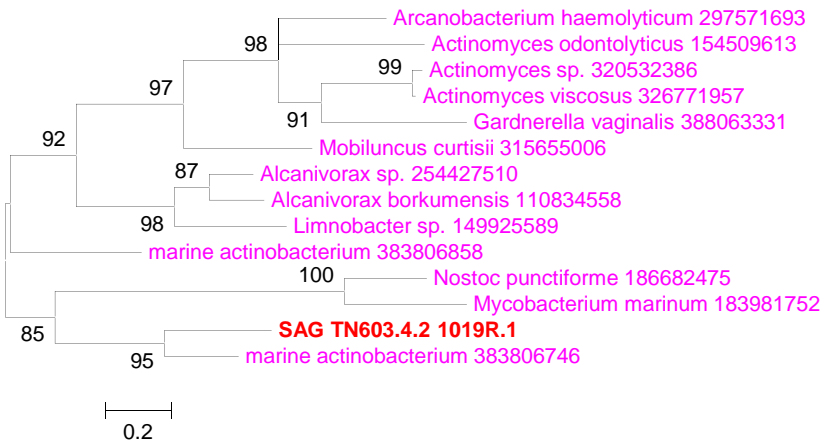

## CL0065: unknown function

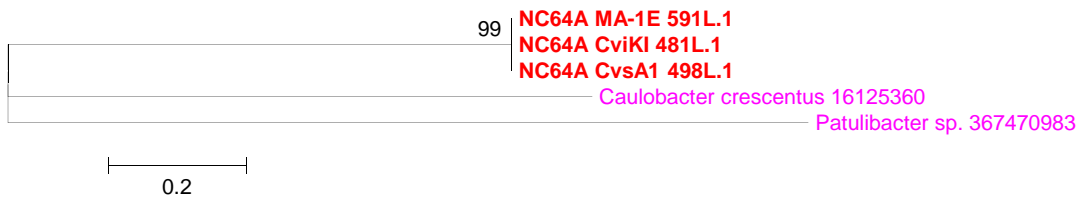

## CL0879: unknown function

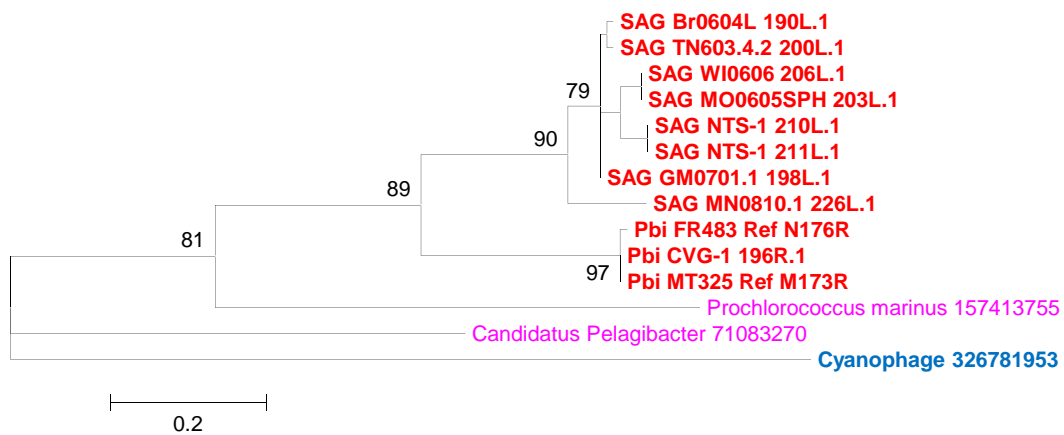

Figure S3: continued



# CL0878: dTDP-glucose pyrophosphorylase /HAD superfamily hydrolase

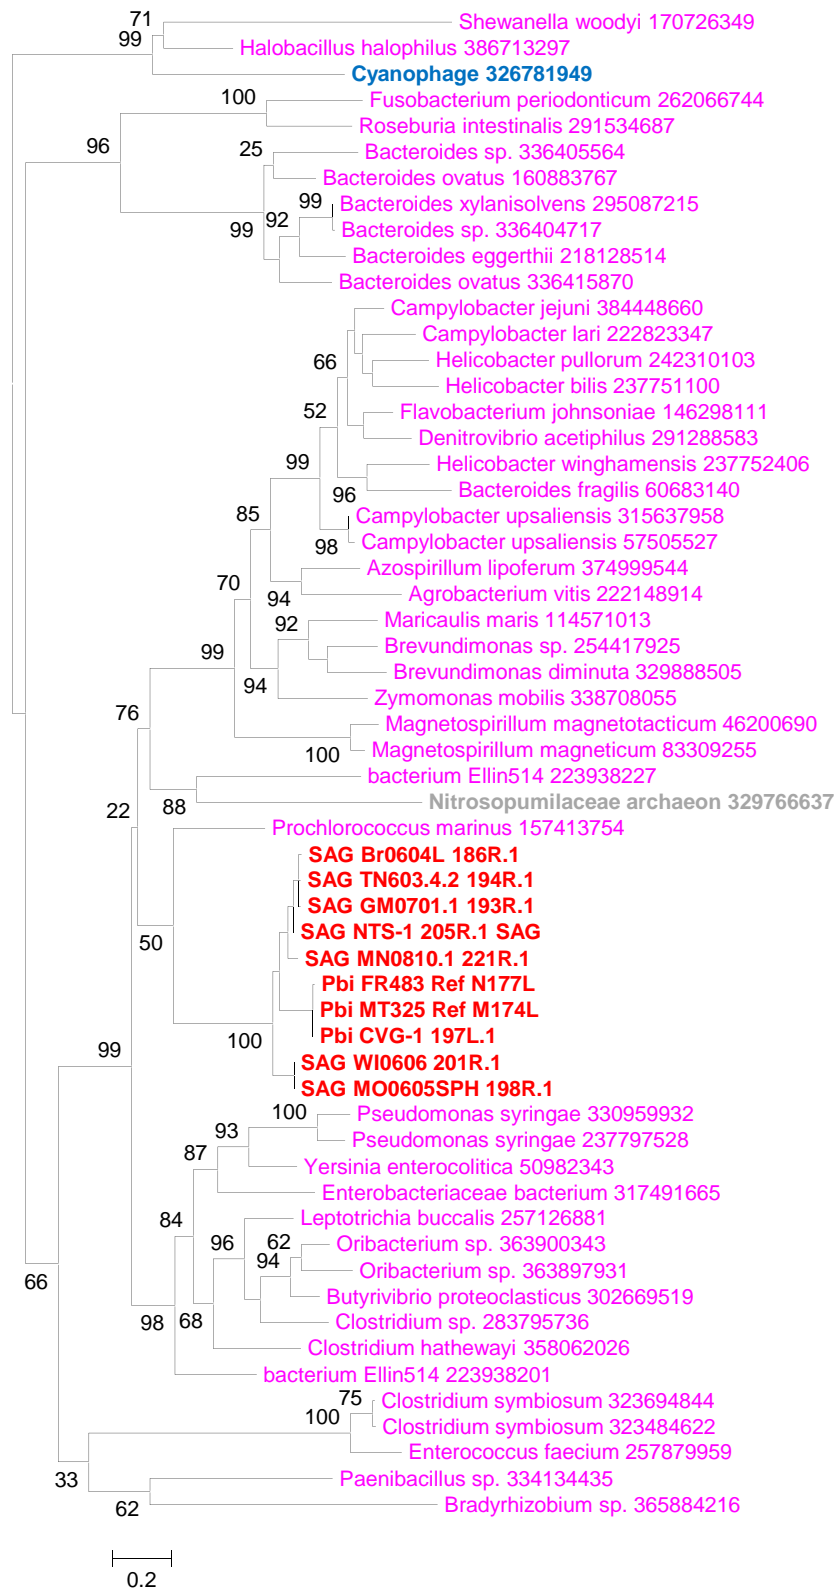

Figure S3: continued

## CL0222: DNA methylase

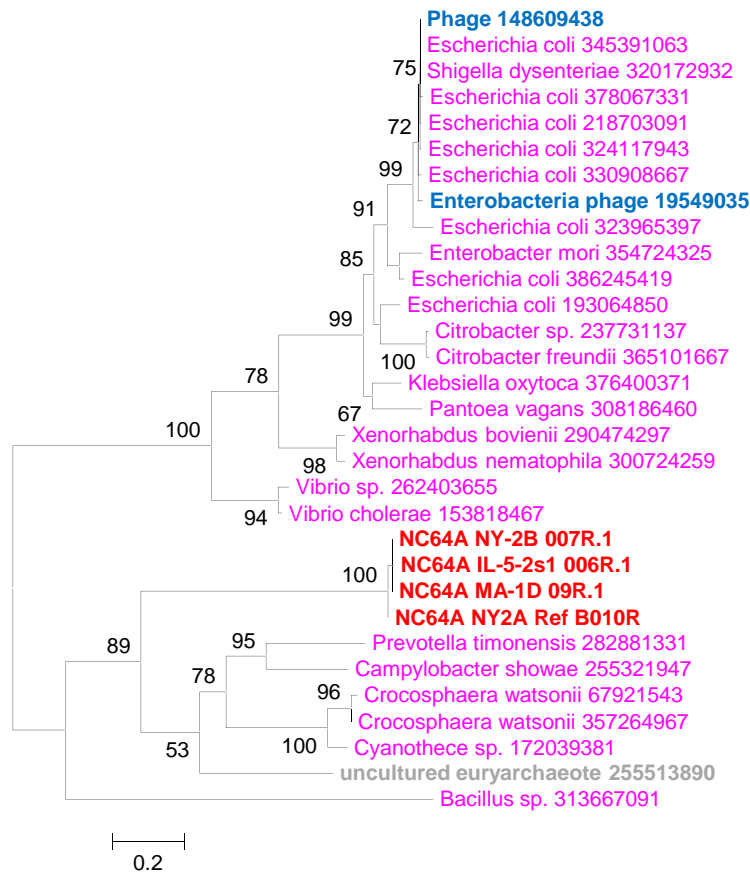

## CL0792: mannose-6-phosphate isomerase

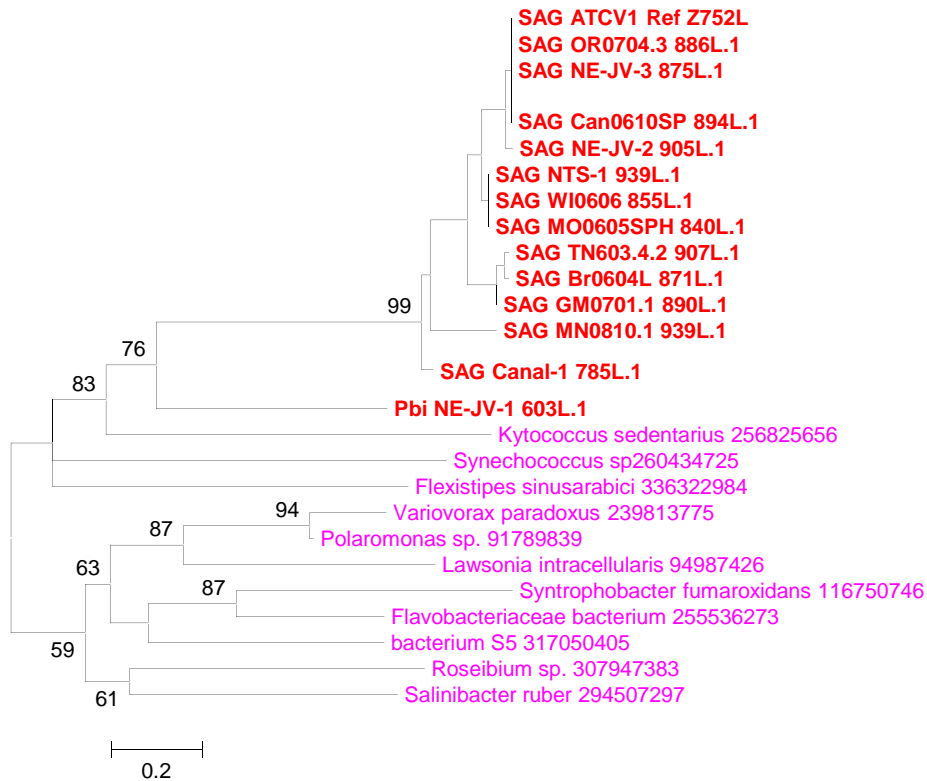

Figure S3: continued

## CL0482: glutaredoxin-like

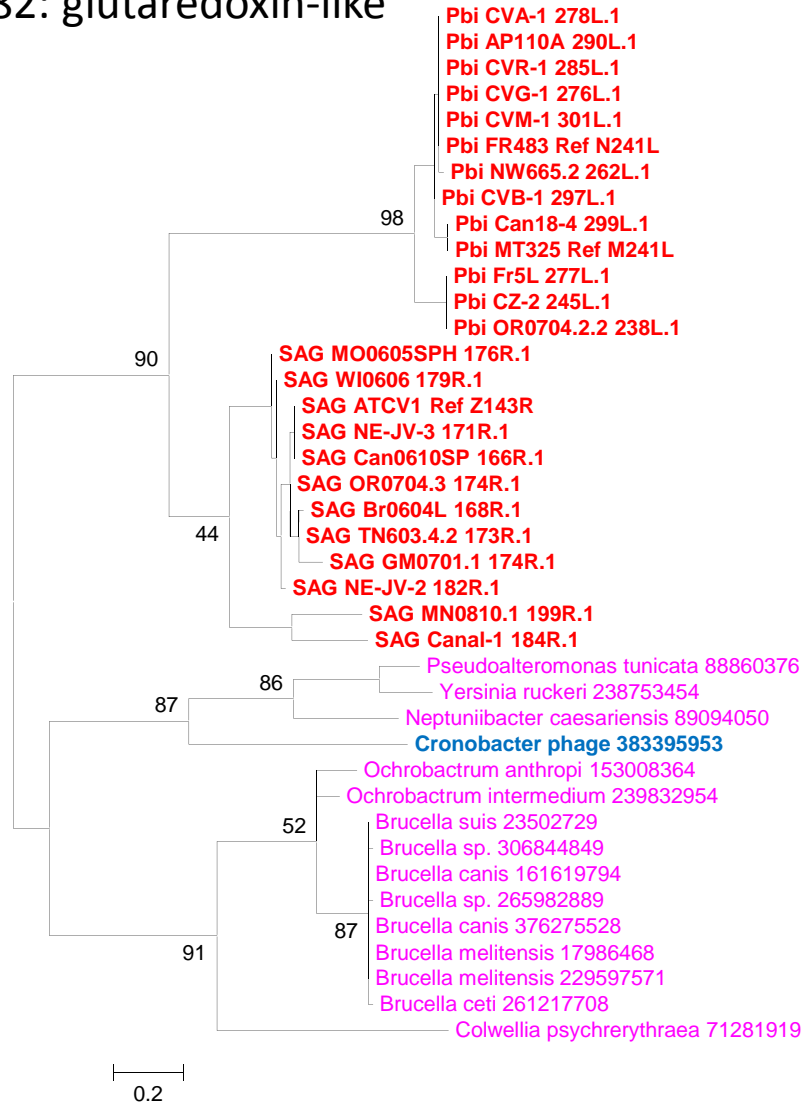

## CL0055: unknown function

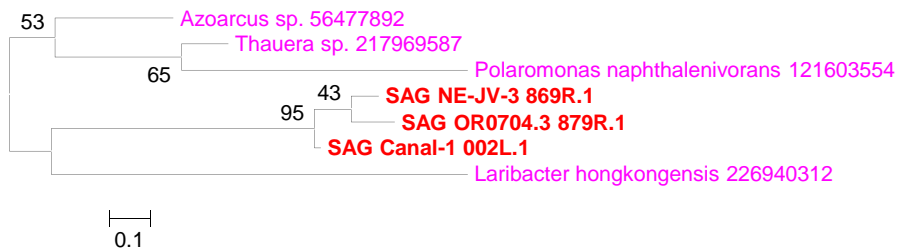

Figure S3: continued

# CL0739: aspartate carbamoyltransferase

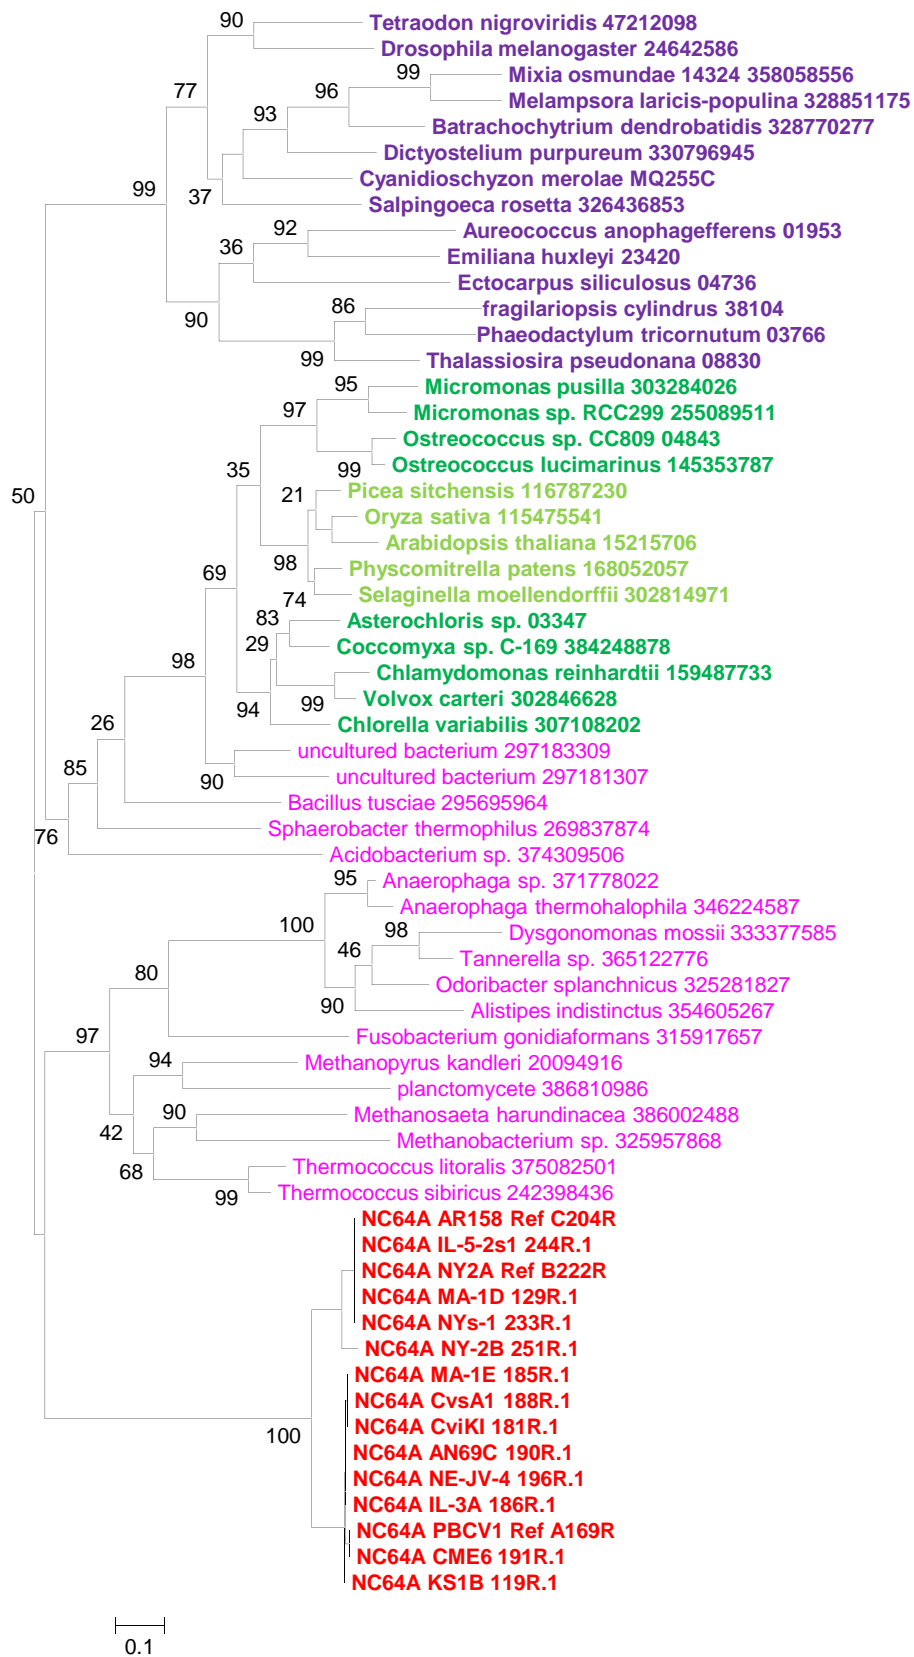

Figure S3: continued

# CL0787:Potassium transporter

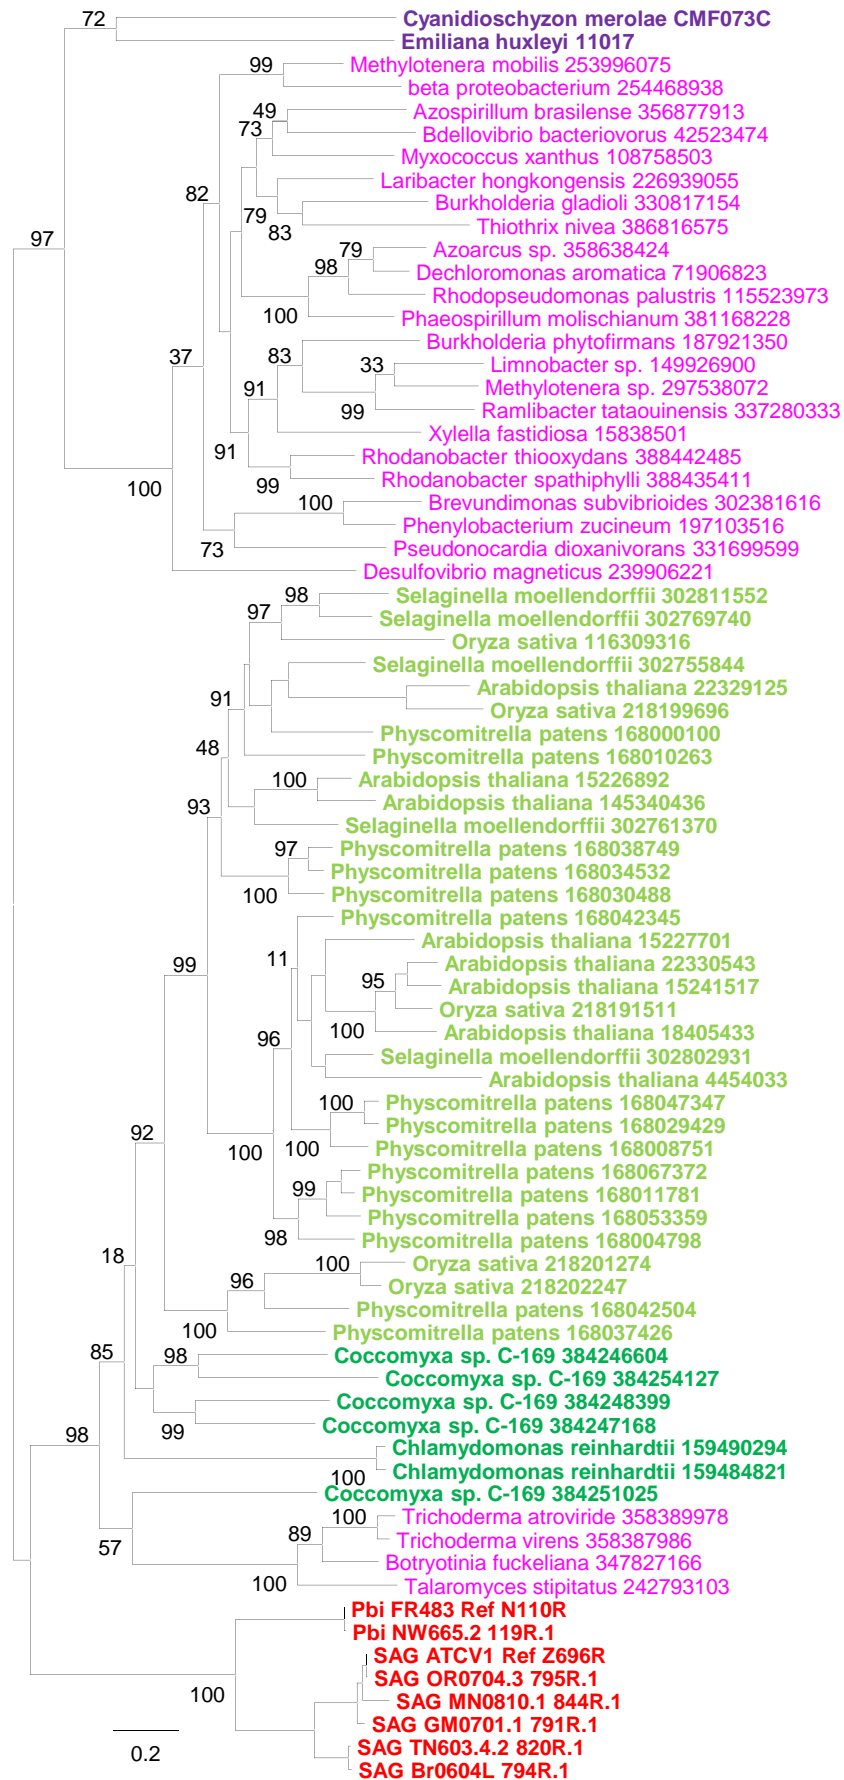

Figure S3: continued

## CL0989: unknown function

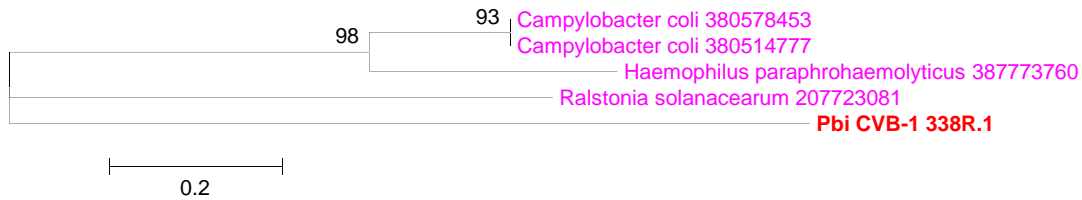

## CL0767: unknown function

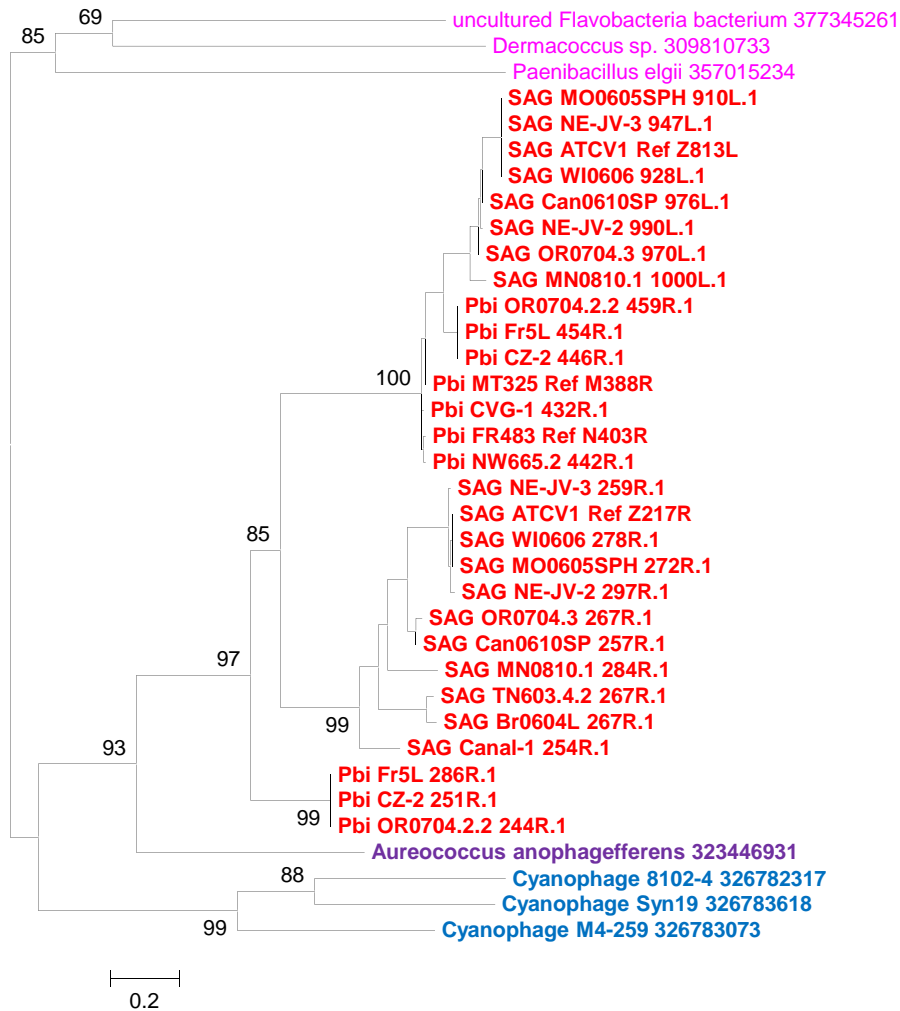

Figure S3: continued

## CL0037: beta-lactamase-like

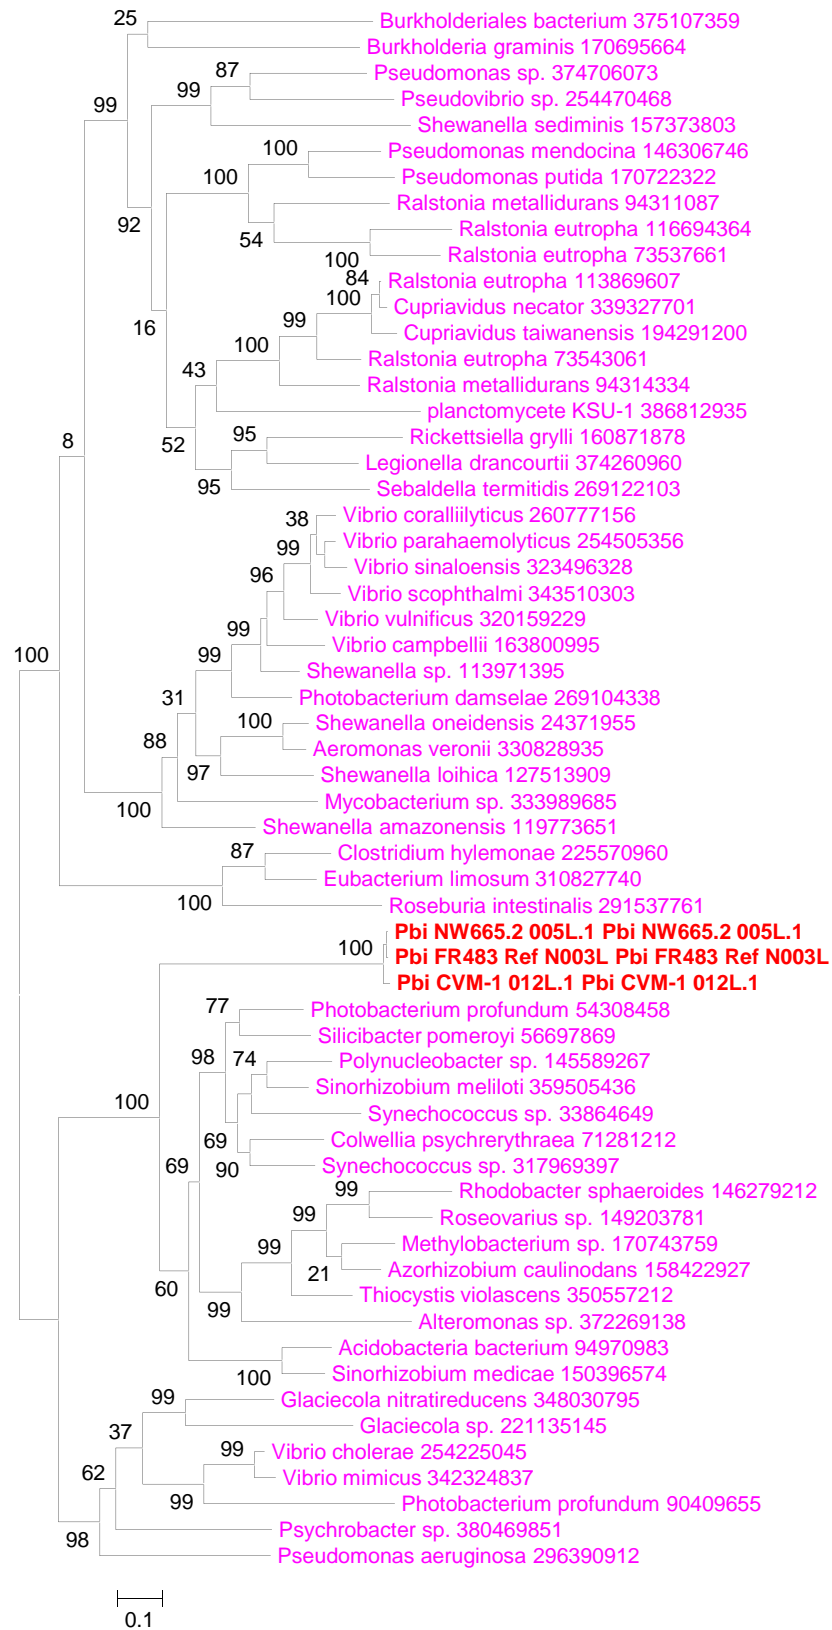

Figure S3: continued

## CL0561: Glycosyltransferase family 17

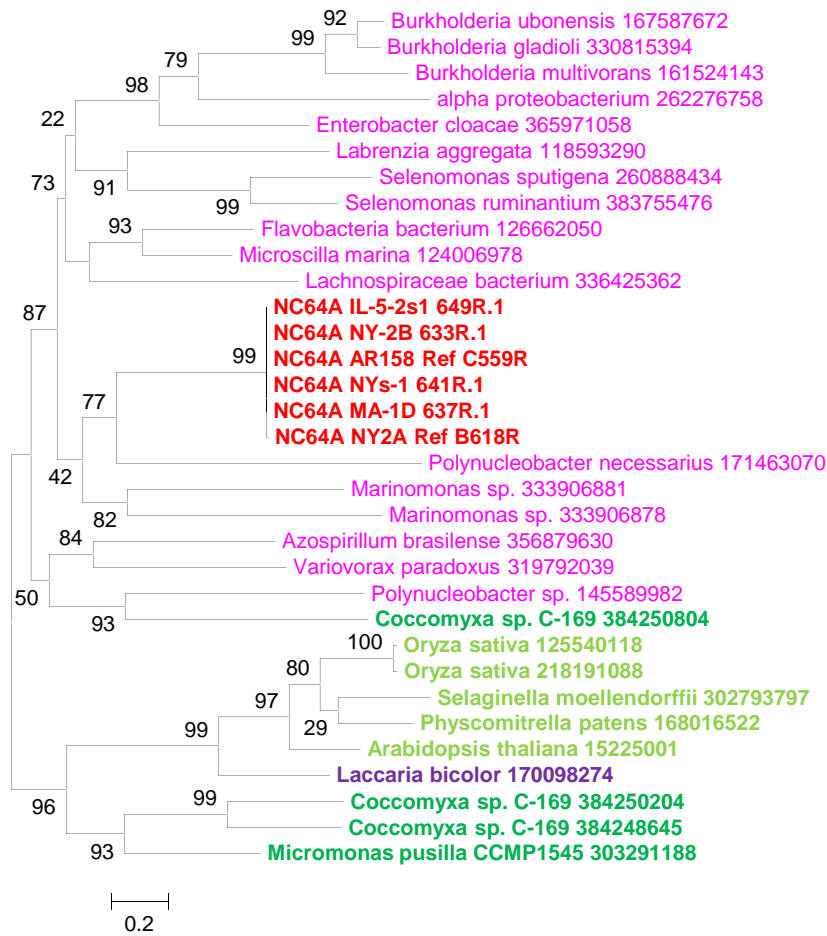

## CL0876: methyltransferase

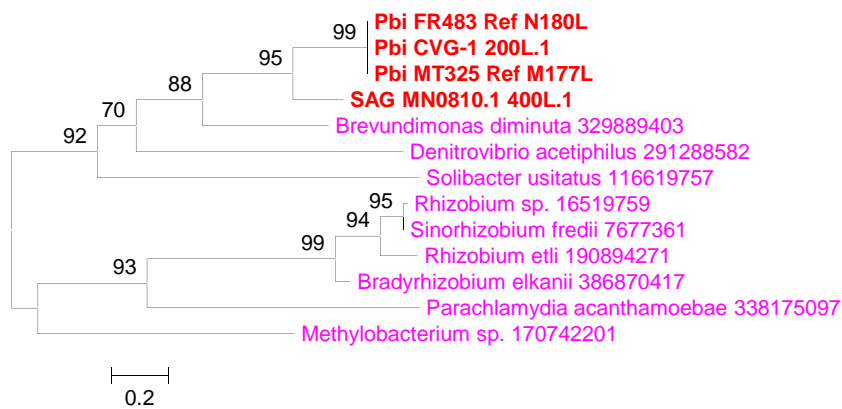

Figure S3: continued



## CL0356: methyltransferase

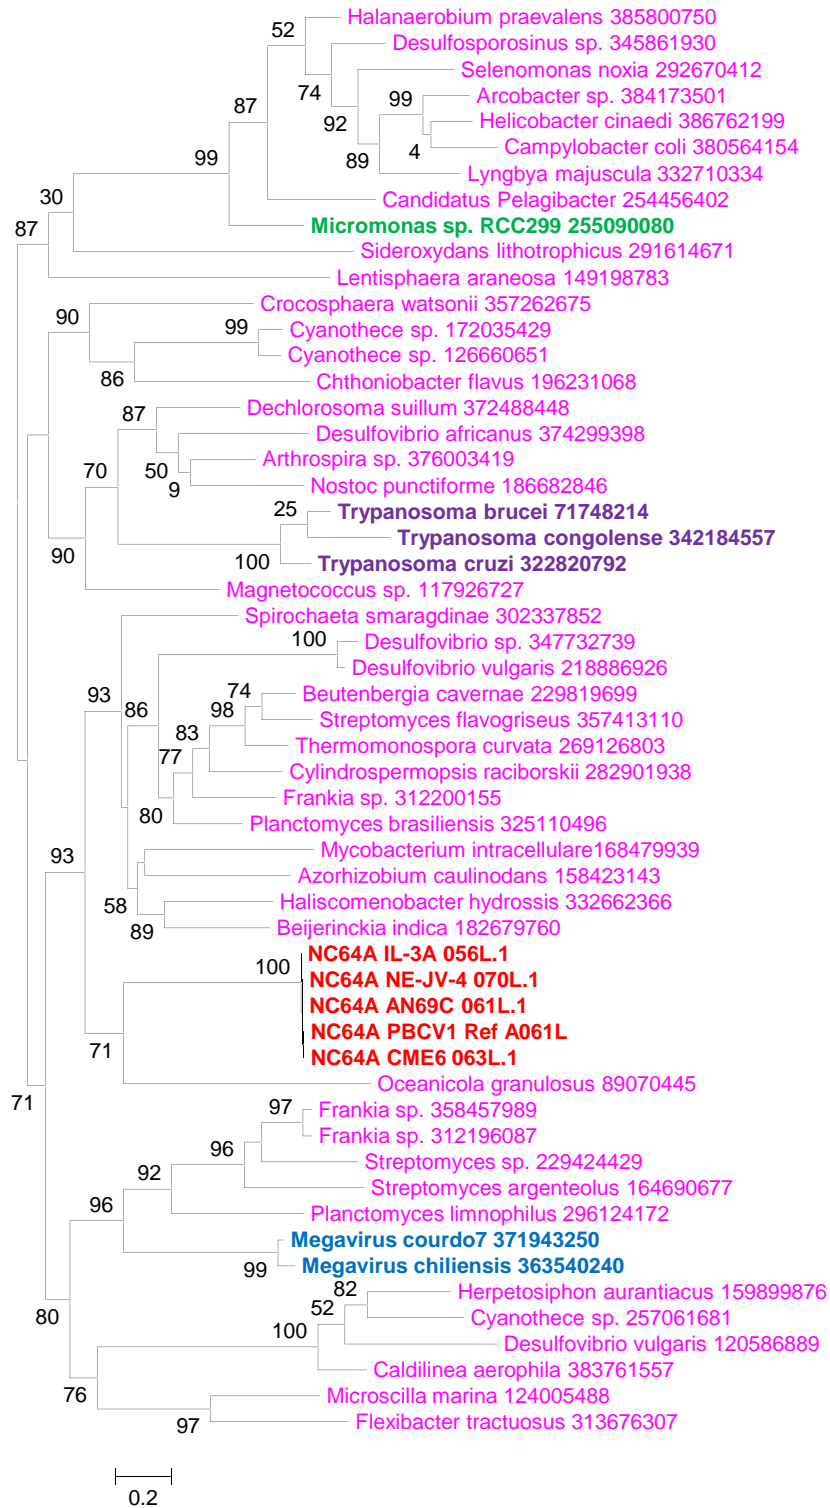

Figure S3: continued

## CL0607: methyltransferase

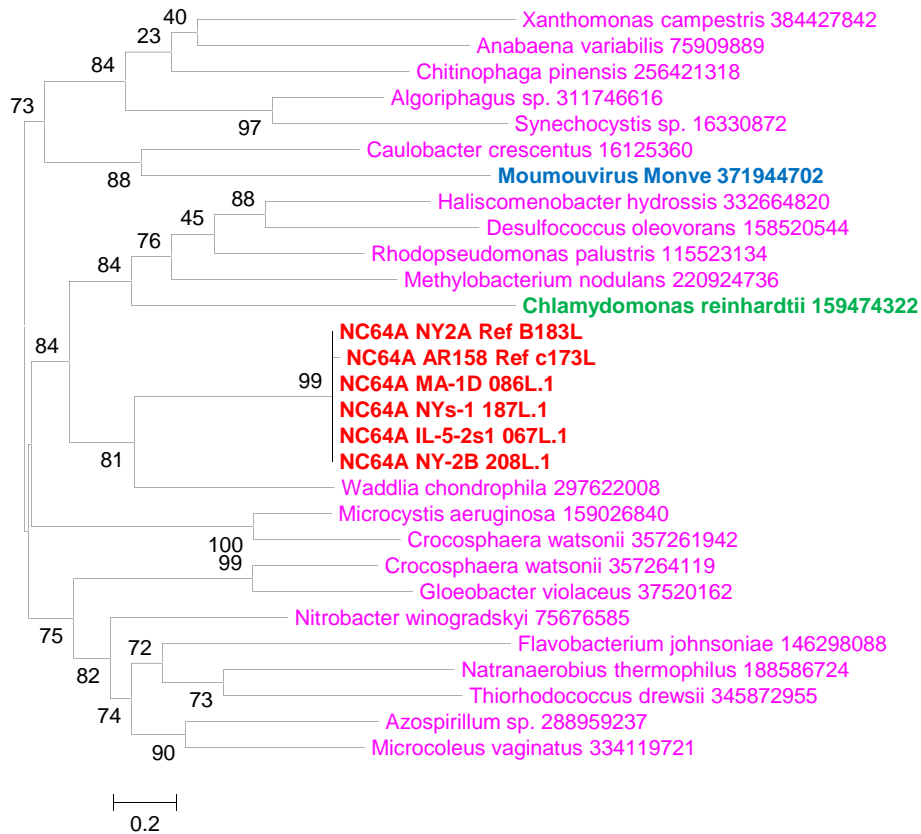

## CL0533: unknown function

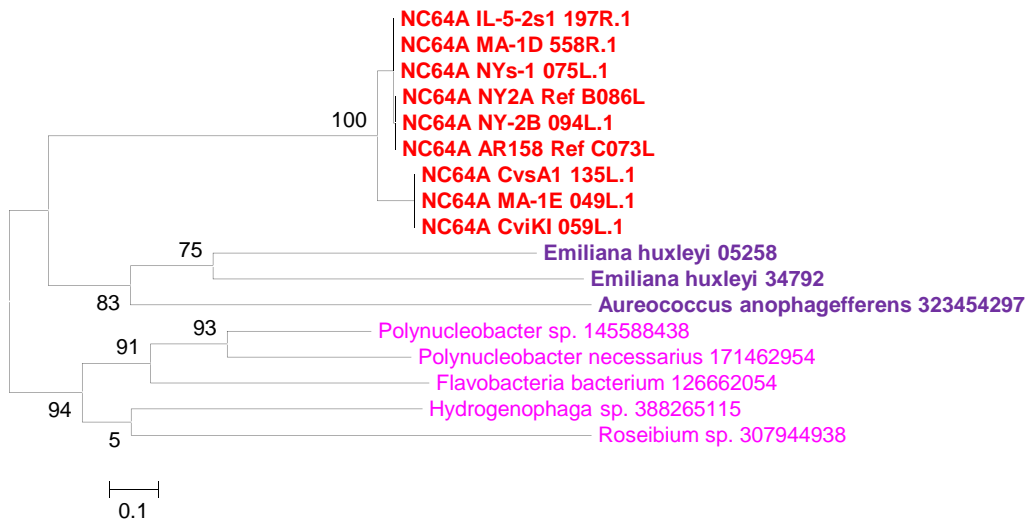

Figure S3: continued

## CL0007: ADP-ribosyl glycohydrolase

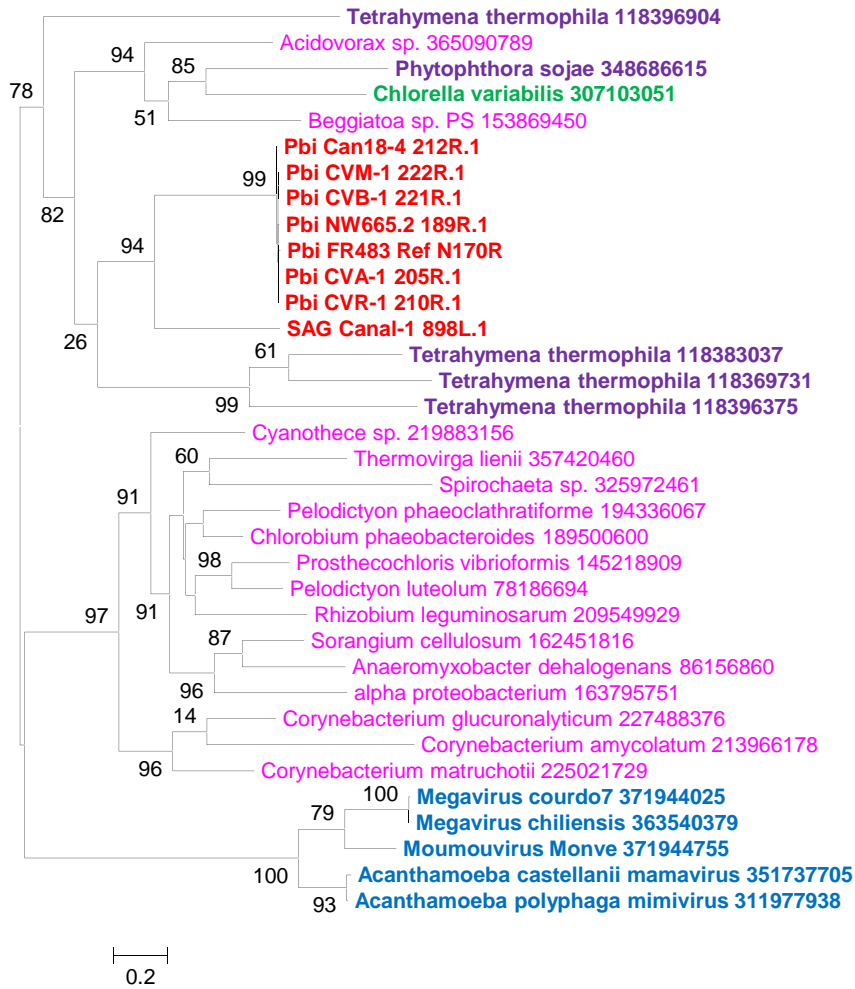

## CL0875: methyltransferase

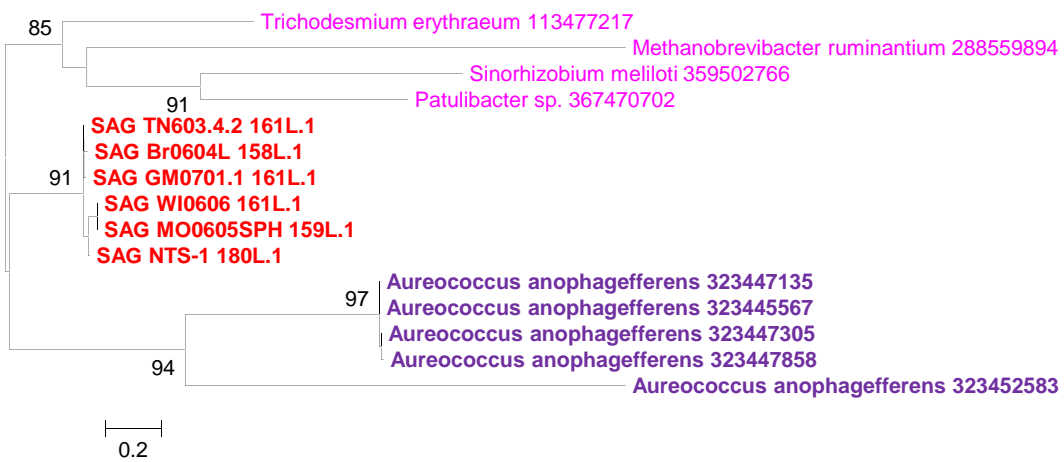

Figure S3: continued

## CL0489: unknown function

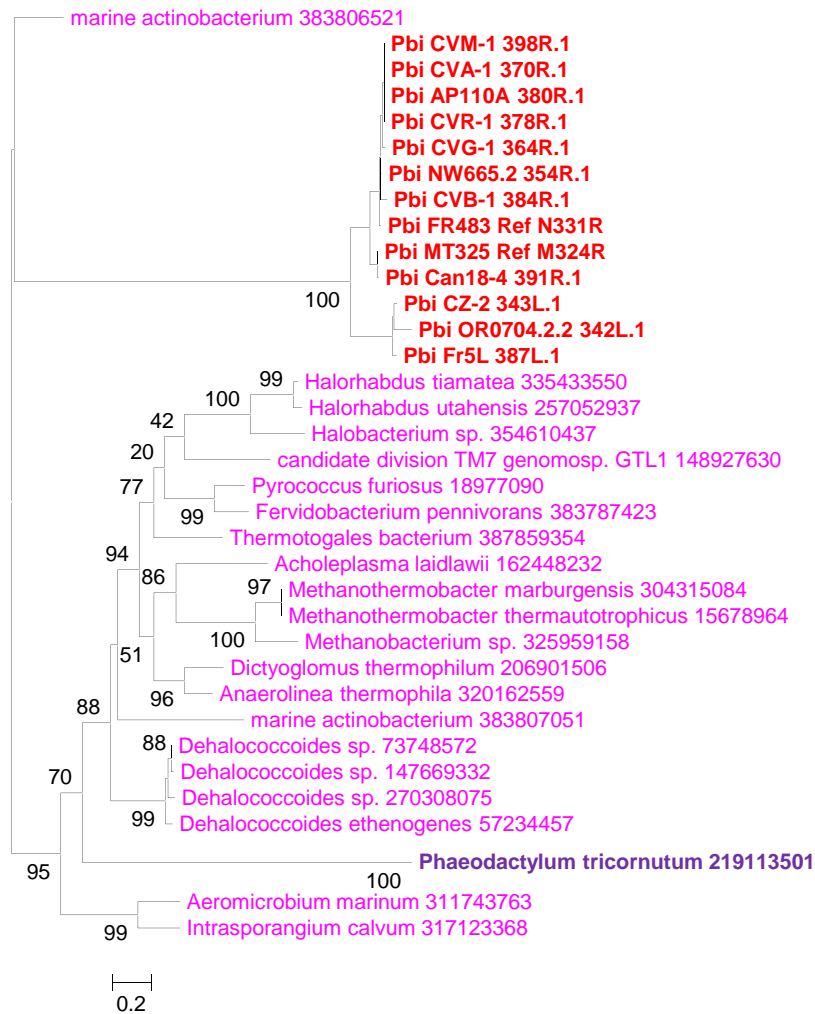

## CL0963: glycosyl hydrolase

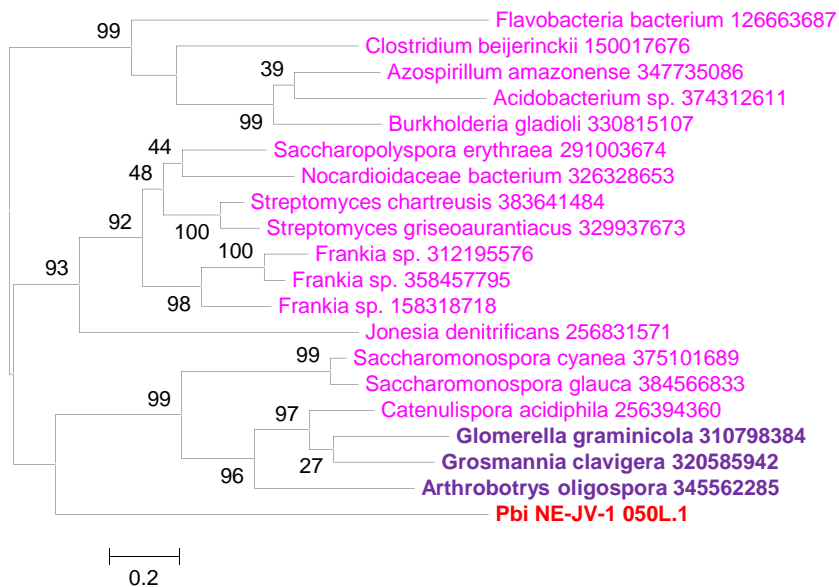

Figure S3: continued

## CL0957: NADH-dependent oxidoreductase

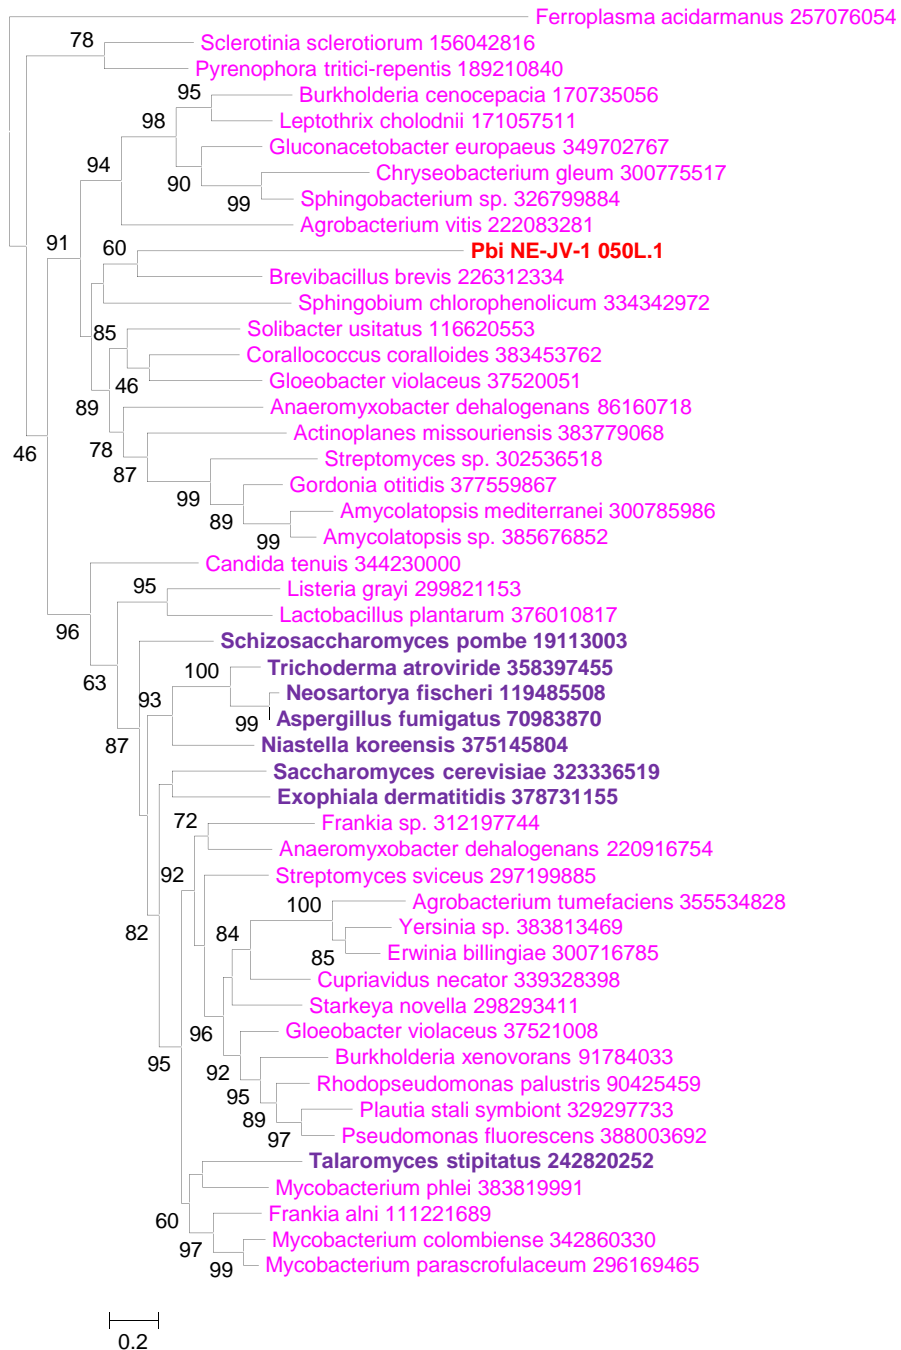

Figure S3: continued

### CL0011: unknown function

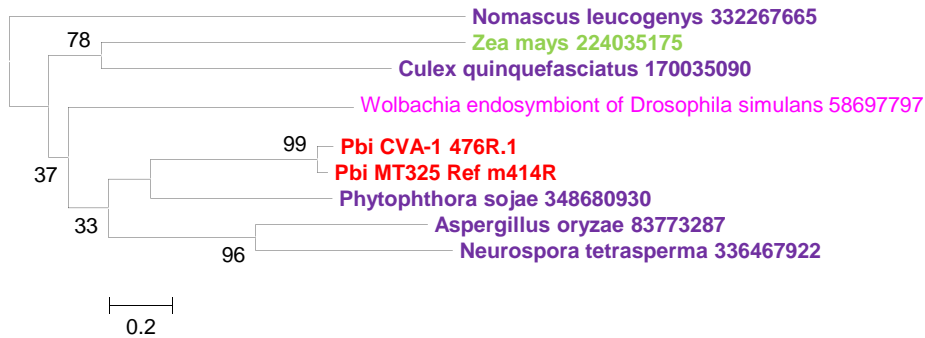

### CL0056: unknown function

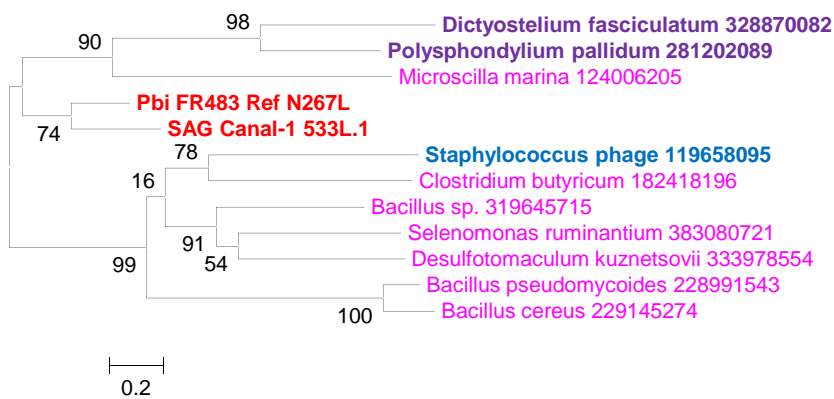

### CL0503: unknown function

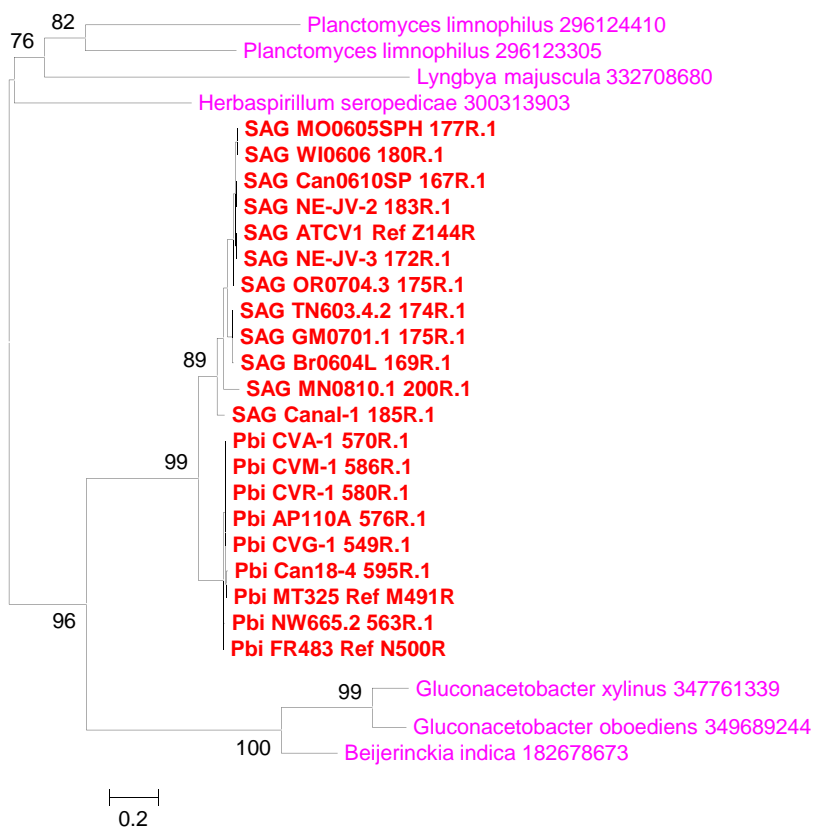

Figure S3: continued
