# Supplementary material for: Towards defining the chloroviruses: a genomic journey through a genus of large DNA viruses
Source: PubMed Central journal article supplement (PMC3602175; doi:10.1186/1471-2164-14-158), 2013-03-08
Supplement: 1471-2164-14-158-S7.pdf [file 1471-2164-14-158-S7.pdf]

Table S4: sister groups to non-ancestral CV proteins based on 35 phylogenetic trees shown in Figure S3

| <b>Cluster ID</b> | <b>Sister group</b>                            | <b>Function</b>                                          |
|-------------------|------------------------------------------------|----------------------------------------------------------|
| CL0007            | <b>Tetrahymena thermophila (Alveolata)</b>     | ADP-ribosyl glycohydrolase                               |
| CL0011            | <b>Phytophthora sojae (stramenopiles)</b>      | unknown                                                  |
| CL0037            | <b>Bacteria</b>                                | beta-lactamase                                           |
| CL0049            | <b>Chlorophyta</b>                             | NADH-dependent fumarate reductase                        |
| CL0055            | <b>Bacteria</b>                                | unknown                                                  |
| CL0056            | Mixed eukaryotes and bacteria                  | unknown                                                  |
| CL0063            | <b>Plantae</b>                                 | unknown                                                  |
| CL0065            | <b>Bacteria</b>                                | unknown                                                  |
| CL0222            | <b>Bacteria</b>                                | DNA methylase                                            |
| CL0356            | <b>Oceanicola granulosus (Bacteria)</b>        | methyltransferase                                        |
| CL0375            | <b>Coccomyxa subellipsoidea (Chlorophyta)</b>  | glycosyltransferase                                      |
| CL0466            | <b>Chlorophyta</b>                             | MIP family channel protein                               |
| CL0482            | <b>Bacteria</b>                                | glutaredoxin                                             |
| CL0489            | <b>Actinobacterium (Bacteria)</b>              | unknown                                                  |
| CL0503            | <b>Bacteria</b>                                | unknown                                                  |
| CL0533            | Basal                                          | unknown                                                  |
| CL0561            | <b>Polynucleobacter necessarius (Bacteria)</b> | Glycosyltransferase family 17                            |
| CL0607            | <b>Waddlia chondrophila (Bacteria)</b>         | methyltransferase                                        |
| CL0624            | <b>Chlorophyta</b>                             | THYLAKOID FORMATION 1; inositol phosphatase-like protein |
| CL0739            | Basal                                          | aspartate carbamoyltransferase                           |
| CL0767            | <b>Aureococcus anophagefferens (diatom)</b>    | unknown                                                  |
| CL0778            | <b>Viridiplantae</b>                           | unknown                                                  |
| CL0780            | <b>Chlorella (Chlorophyta)</b>                 | dUDP-D-glucose 4,6-dehydratase                           |
| CL0787            | <b>Viridiplantae</b>                           | Potassium transporter                                    |
| CL0792            | <b>Kytococcus sedentarius (Bacteria)</b>       | mannose-6-phosphate isomerase                            |
| CL0796            | <b>Chlorophyta</b>                             | ribonucleoside-triphosphate reductase                    |
| CL0875            | Basal                                          | methyltransferase                                        |
| CL0876            | <b>Brevundimonas diminuta (Bacteria)</b>       | methyltransferase                                        |
| CL0878            | <b>Prochlorococcus marinus (Bacteria)</b>      | dTDP-glucose pyrophosphorylase/HAD superfamily hydrolase |
| CL0879            | <b>Prochlorococcus marinus (Bacteria)</b>      | unknown                                                  |
| CL0940            | <b>Actinobacterium (Bacteria)</b>              | Nitroreductase                                           |
| CL0957            | <b>Brevibacillus brevis (Bacteria)</b>         | NADH-dependent oxidoreductase                            |
| CL0963            | Mixed eukaryotes and bacteria                  | glycosyl hydrolase                                       |
| CL0978            | <b>Streptophyta</b>                            | unknown                                                  |
| CL0989            | <b>Bacteria</b>                                | unknown                                                  |
