# Supplementary material for: Towards defining the chloroviruses: a genomic journey through a genus of large DNA viruses
Source: PubMed Central journal article supplement (PMC3602175; doi:10.1186/1471-2164-14-158), 2013-03-08
Supplement: 1471-2164-14-158-S8.pdf [file 1471-2164-14-158-S8.pdf]

Figure S4

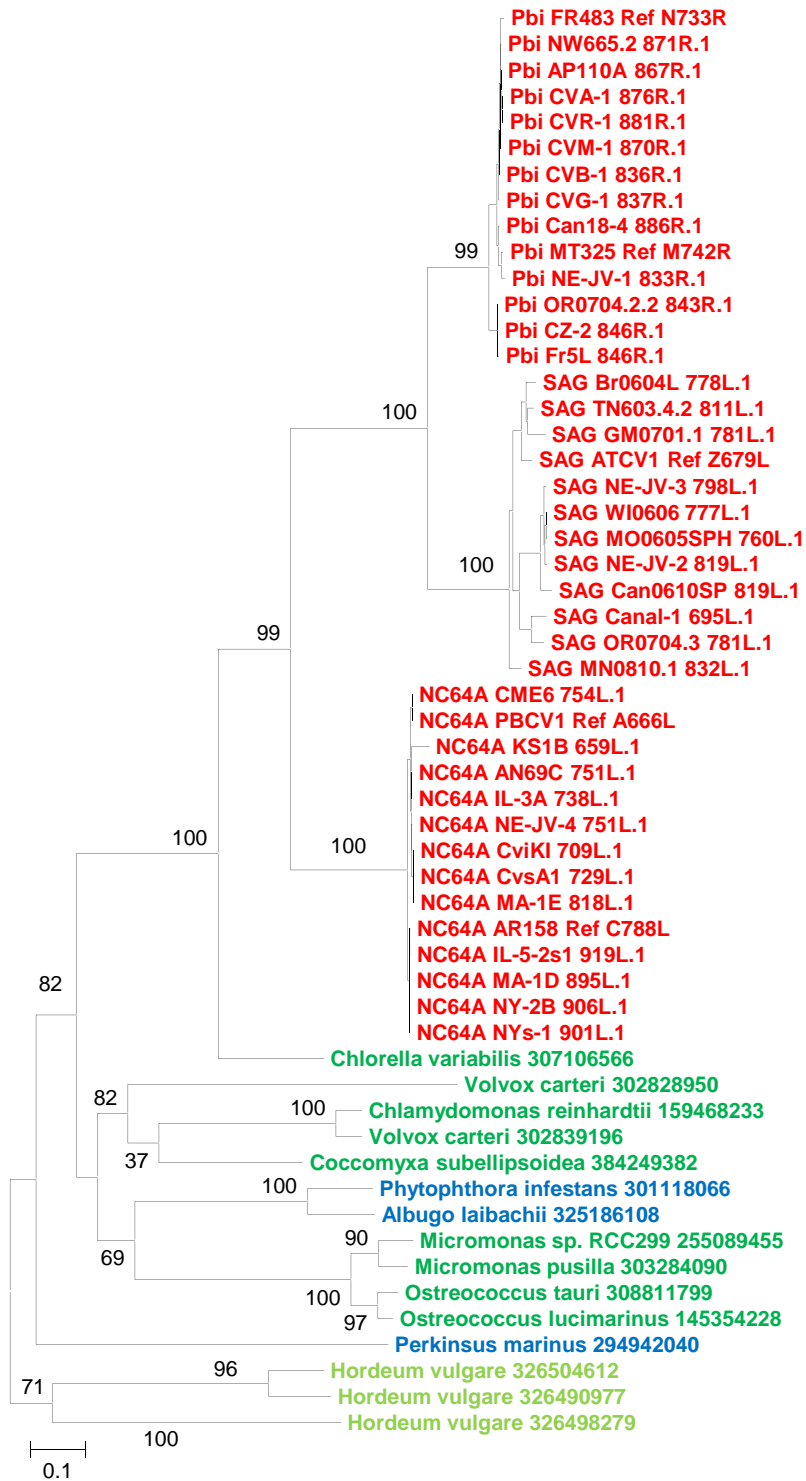

CL0450: translation elongation factor EIF3

# CL0511: unknown function

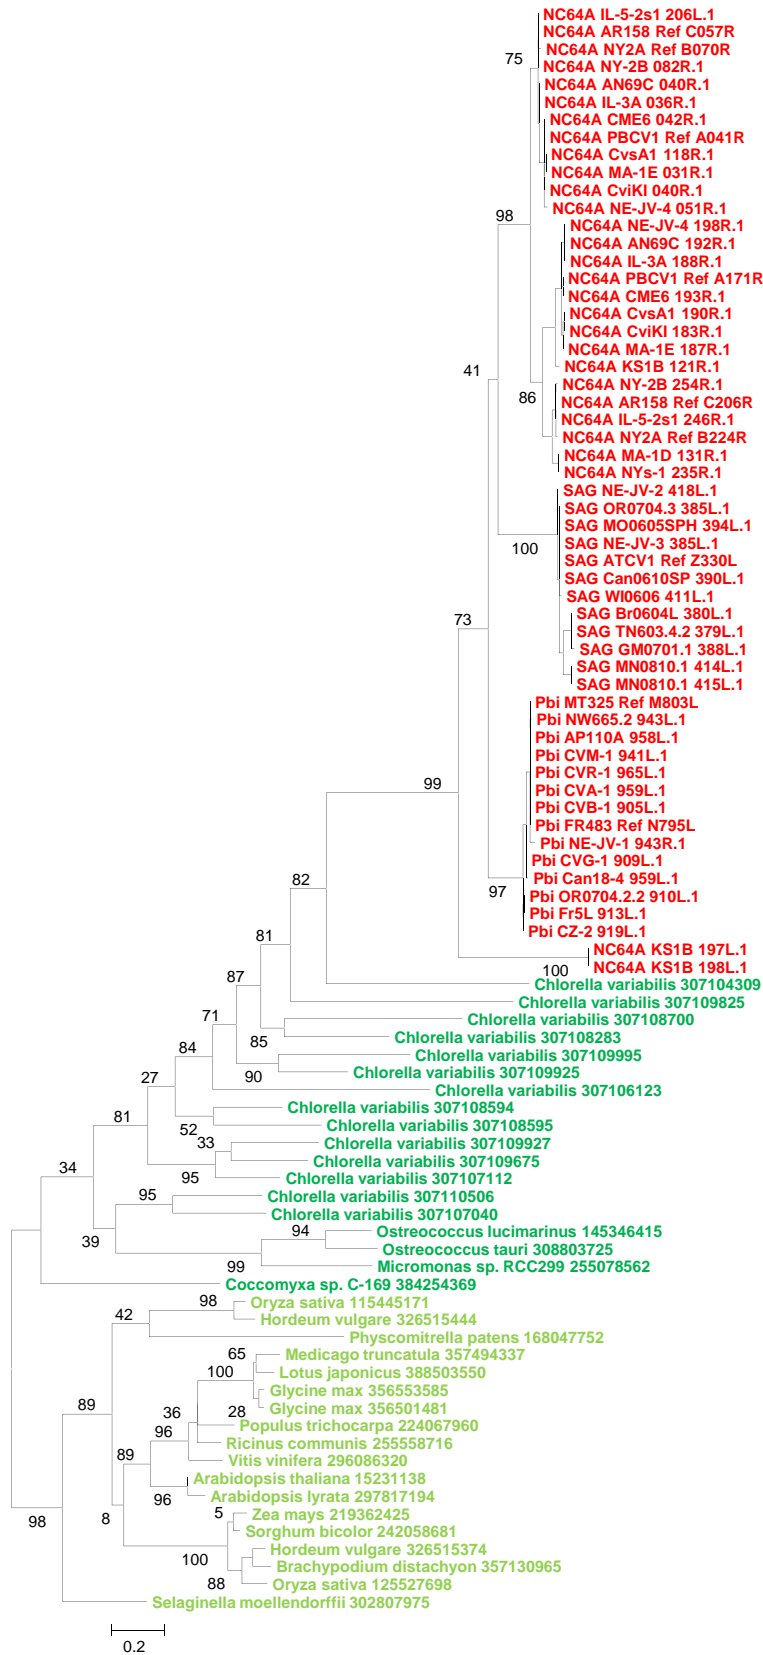

Figure S4: continued

## CL0288: chitin deacetylase

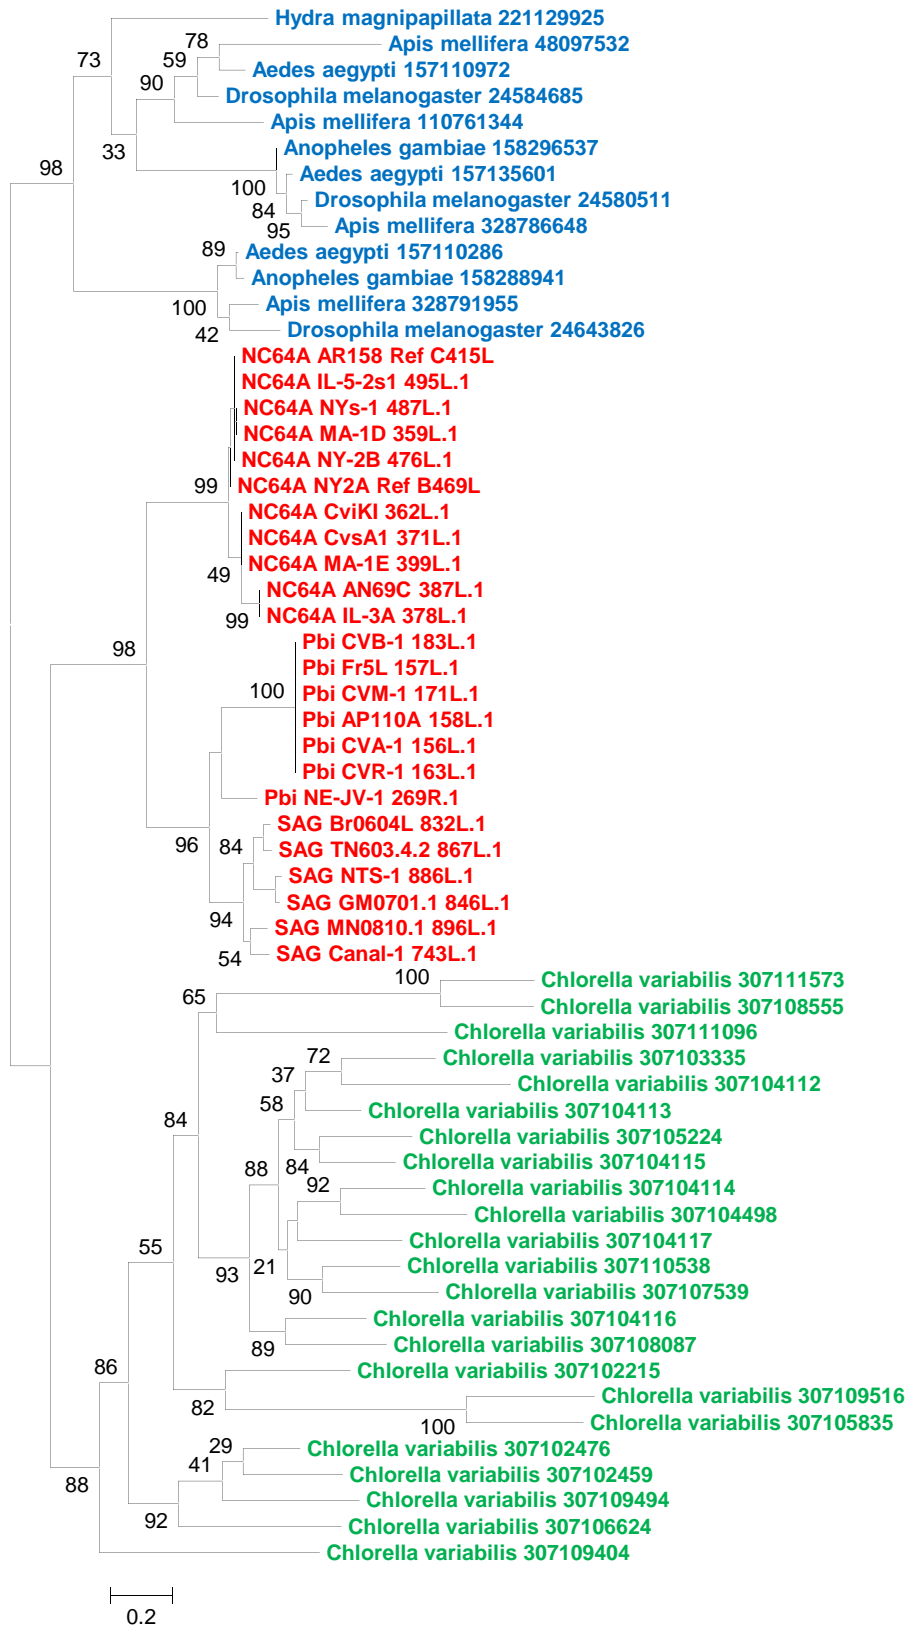

Figure S4: continued

# CN0022: unknown function

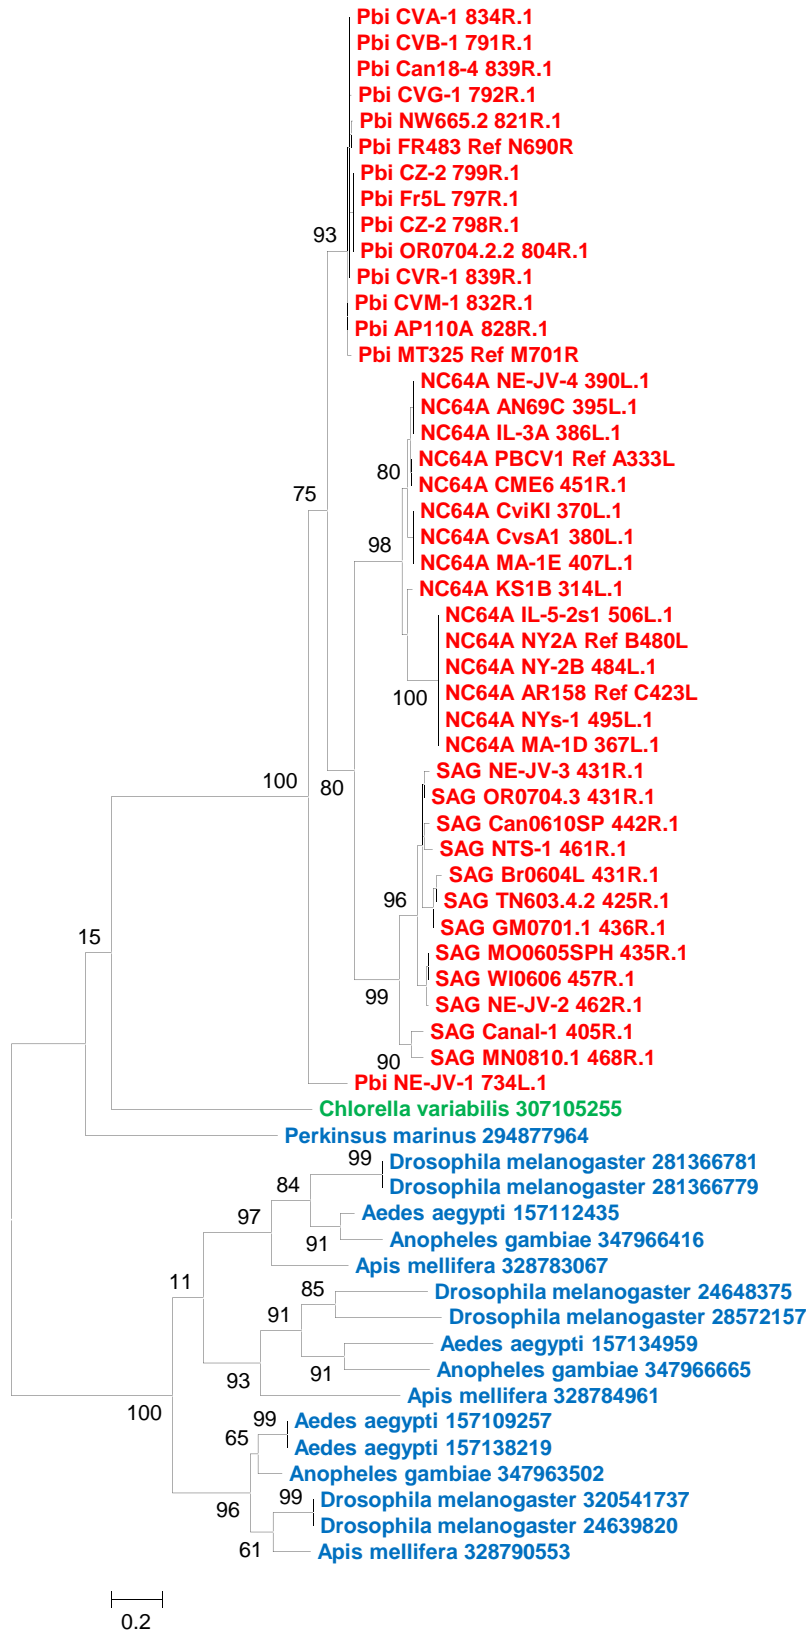

Figure S4: continued

# CL0887: chitinase

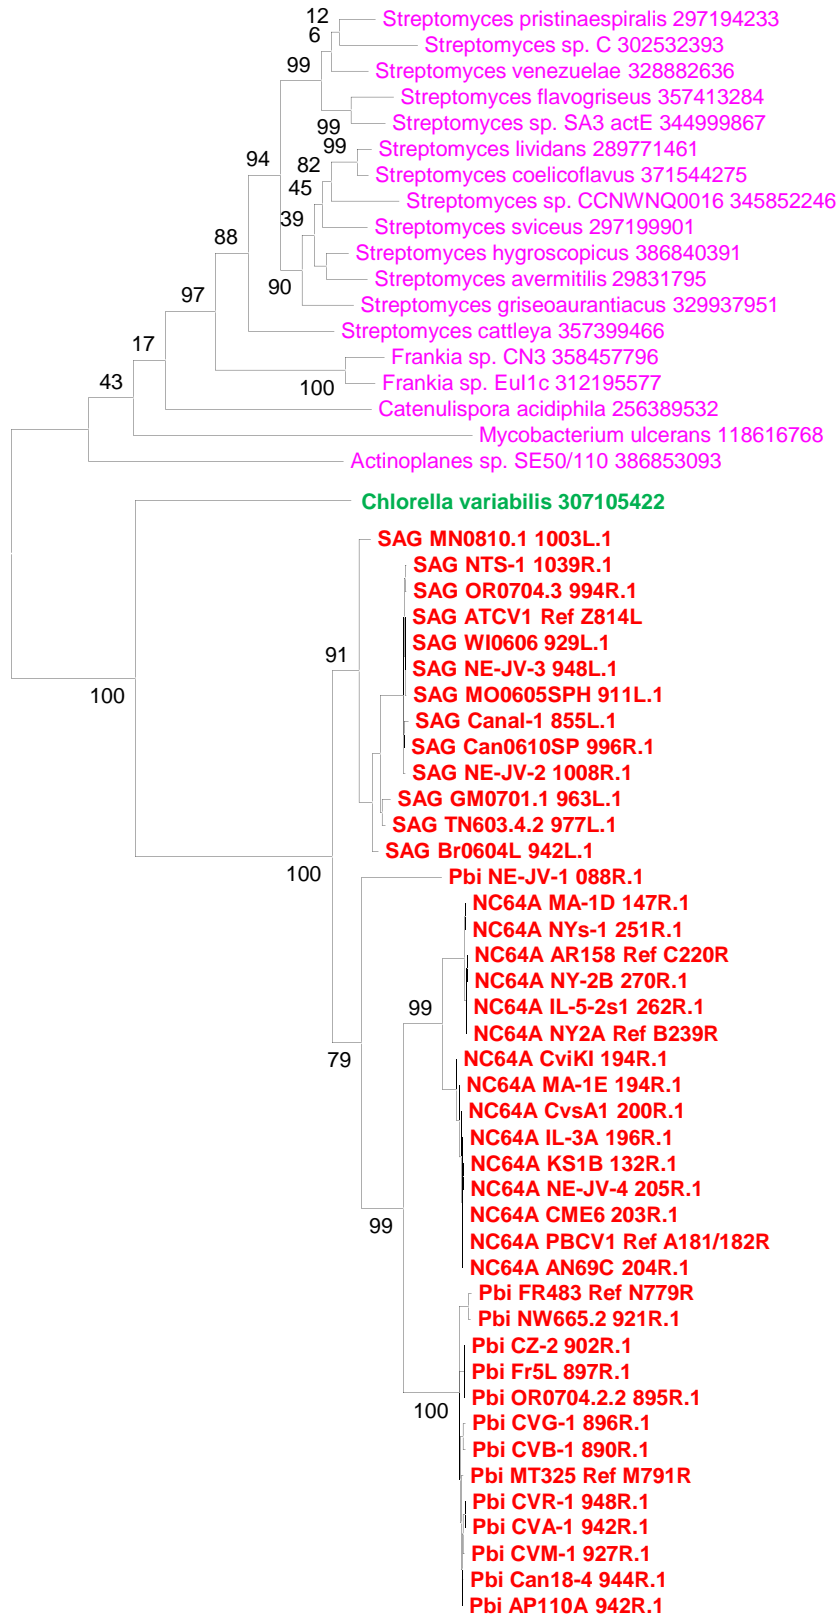

Figure S4: continued

## CL0531: unknown function

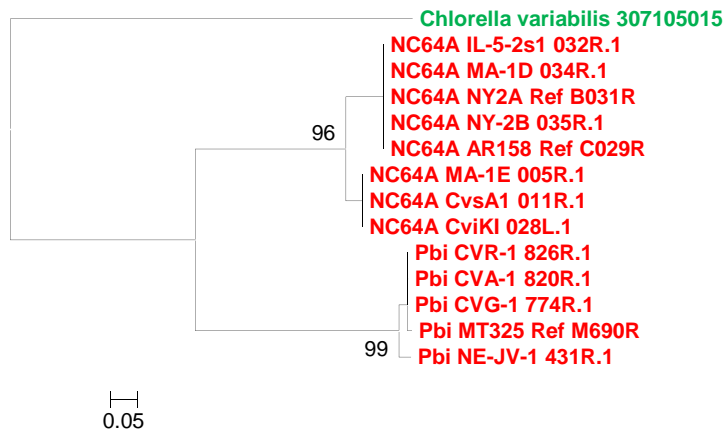

Figure S4: continued
