# Supplementary material for: Towards defining the chloroviruses: a genomic journey through a genus of large DNA viruses
Source: PubMed Central journal article supplement (PMC3602175; doi:10.1186/1471-2164-14-158), 2013-03-08
Supplement: 1471-2164-14-158-S9.pdf [file 1471-2164-14-158-S9.pdf]

Table S5: attributes of the sequenced chloroviruses

| Virus                                                     | Host              | Attributes and comments (plaque size, plaque morphology, gene content, etc.)         | Source of isolate                         | Date collected |
|-----------------------------------------------------------|-------------------|--------------------------------------------------------------------------------------|-------------------------------------------|----------------|
| <b><i>Chlorella variabilis</i> NC64A Virus Isolates</b>   |                   |                                                                                      |                                           |                |
| CviKI                                                     | Chlorella NC64A   | from Yamada Lab, Japan; encodes Hyaluronan Synthetase and Chitin Synthase            | Kyoto, Japan                              | 1990           |
| IL-3A                                                     | Chlorella NC64A   | Serves as the "null mutant" in the hyaluronan/chitin competition series              | IL, USA                                   | Oct. 1983      |
| CvsA1                                                     | Chlorella NC64A   | from Yamada Lab, Japan; encodes 2 Chitin Synthase genes (& gfat)                     | Sawara, Japan                             | April 1992     |
| MA-1D                                                     | Chlorella NC64A   | see [1] table 2; Small plaque-forming virus                                          | MA, USA                                   | Aug. 1984      |
| NYs-1                                                     | Chlorella NC64A   | see [1] table 2; Small plaque-forming virus                                          | NY, USA (river)                           | Aug. 1985      |
| IL-5-2s1                                                  | Chlorella NC64A   | see [1] table 2; Small plaque-forming virus                                          | IL, USA (farm pond)                       | May 1986       |
| KS1B                                                      | Chlorella NC64A   | Small plaque-forming virus                                                           | Kansas, USA                               | May 2003       |
| NY-2B                                                     | Chlorella NC64A   | see [1] table 2; Very small plaque-forming virus                                     | NY, USA (river)                           | Aug. 1984      |
| AN69C                                                     | Chlorella NC64A   | Small plaque-forming virus                                                           | Canberra, Australia                       | March 1995     |
| MA-1E                                                     | Chlorella NC64A   | see [1] table 2; Gene re-arrangement and insertion in the PBCV-1_A250R-homolog locus | MA, USA                                   | Aug 1984       |
| NE-JV4                                                    | Chlorella NC64A   | regular plaques of medium-to-large size                                              | Rowe Bird Sanctuary; NE, USA              | May 2008       |
| <b><i>Chlorella heliozoae</i> SAG 3.83 Virus Isolates</b> |                   |                                                                                      |                                           |                |
| NTS-1                                                     | Chlorella SAG3.83 | Alkaline lake isolates, fuzzy plaques                                                | Next to Smith Lake, NE, USA (CLNWR)       | June 2008      |
| Canal-1                                                   | Chlorella SAG3.83 | Alkaline lake isolates, fuzzy plaques; does not completely lyse a culture            | canal exiting Smith Lake, NE, USA (CLNWR) | June 2008      |
| TN603.4.2                                                 | Chlorella SAG3.83 | First SAG 3.83 virus found in the USA; Large, clear plaques;                         | Tennessee, USA                            | April 2006     |
| WI0606                                                    | Chlorella SAG3.83 | Normal plaque size and shape; Geographic site                                        | Madison Wisconsin, USA                    | July 2006      |
| Br0604L                                                   | Chlorella SAG3.83 | Normal plaque size and shape; Geographic site                                        | St. Paul, Brazil                          | 2006           |
| GM0701.1                                                  | Chlorella SAG3.83 | Normal plaque size and shape; Geographic site                                        | Guatemala                                 | January 2007   |
| MO0605SPH                                                 | Chlorella SAG3.83 | Cloudy plaques; Geographic site                                                      | Missouri, USA                             | 2006           |
| Can0610SP                                                 | Chlorella SAG3.83 | Normal plaque size and shape; Geographic site                                        | British Columbia, Canada                  | August 2006    |
| OR0704.3                                                  | Chlorella SAG3.83 | Normal plaque size and shape; Geographic site                                        | Willamette River, Corvallis, Oregon, USA  | July 2007      |
| MN0810.1                                                  | Chlorella SAG3.83 | Normal plaque size and shape; Geographic site (abandoned mine)                       | Minnesota, USA                            | August 2008    |
| NE-JV2                                                    | Chlorella SAG3.83 | small, irregularly shaped plaques with fuzzy edges                                   | Rowe Bird Sanctuary; Gibbon, NE, USA      | May 2008       |
| NE-JV3                                                    | Chlorella SAG3.83 | medium sized, irregularly shaped plaques with fuzzy edges                            | Gudmundsen Ranch                          | May 2008       |

| Virus                                                    | Host             | Attributes and comments (plaque size, plaque morphology, gene content, etc.) | Source of isolate                   | Date collected |
|----------------------------------------------------------|------------------|------------------------------------------------------------------------------|-------------------------------------|----------------|
| <b><i>Micractinium conductrix</i> Pbi Virus Isolates</b> |                  |                                                                              |                                     |                |
| CVA-1                                                    | Micractinium Pbi | see [2]; Normal plaque size and shape                                        | Amönau, Germany                     | 1984           |
| CVB-1                                                    | Micractinium Pbi | see [2]; Normal plaque size and shape                                        | Berlin, Germany                     | 1984           |
| CVG-1                                                    | Micractinium Pbi | see [2]; Normal plaque size and shape                                        | Göttingen, Germany                  | 1984           |
| CVM-1                                                    | Micractinium Pbi | see [2]; Normal plaque size and shape                                        | Marburg, Germany                    | 1984           |
| CVR-1                                                    | Micractinium Pbi | see [2]; Normal plaque size and shape                                        | Rauschenberg, Germany               | 1984           |
| NW665.2                                                  | Micractinium Pbi | Small, regularly shaped plaques                                              | Norway                              | 1995           |
| AP110A                                                   | Micractinium Pbi | High plaque numbers; 1 of a collection of 10 "AP" viruses                    | unknown                             | unknown        |
| Can18-4                                                  | Micractinium Pbi | Normal plaque size and shape; Geographic site                                | Canada                              | 1995           |
| CZ-2                                                     | Micractinium Pbi | Normal plaque size and shape; Geographic site                                | Czech Republic                      | 1995           |
| Fr5L                                                     | Micractinium Pbi | Normal plaque size and shape; Geographic site                                | France                              | 1995           |
| OR0704.2.2                                               | Micractinium Pbi | Normal plaque size and shape; Geographic site                                | Willamette River, Corvallis, Oregon | July 2007      |
| NE-JV1                                                   | Micractinium Pbi | Small, regularly shaped plaques with fuzzy edges                             | South Platte River, Nebraska        | May 2008       |

1. Van Etten JL, Lane LC, Meints RH: **Viruses and virus-like particles of eukaryotic algae.** *Microbiol. Rev.* 1991, **55**:586–620.

2. Reisser W, Burbank D, Meints R, Becker B, Van Etten J: **Viruses distinguish symbiotic *Chlorella* spp. of *Paramecium bursaria*.** *Endocytobiosis and Cell Research* 1991, **7**:247–251.
